# Supplementary material
Source: PubMed Central journal article supplement (PMC2719290)
Supplement: NIHMS4594-supplement-S1.pdf [file NIHMS4594-supplement-S1.pdf]

## Supplementary Appendix

This appendix has been provided by the authors to give readers additional information about their work.

Supplement to: Samani NJ, Erdmann J, Hall AS, et al. Genomewide association analysis of coronary artery disease. *N Engl J Med* 2007;357. DOI: 10.1056/NEJMoa072366.

## Online Supplementary Materials

# Genome-wide association analysis of coronary artery disease

**NJ Samani et al.**

The supplementary materials have the following sections in order:

1. Recruitment of subjects
2. Genotyping and quality control
3. Analysis for population sub-structure
4. Additional information on statistical analysis
5. Haplotype analysis
6. Selection of candidate genes
7. Supplementary Tables
8. Supplementary Figures
9. References
10. List of members of the WTCCC consortium
11. List of members of the Cardiogenics consortium

## 1. Recruitment of Subjects

**WTCCC cases** Cases were European Caucasians who had a validated history of either myocardial infarction (MI) or coronary revascularisation (coronary artery bypass surgery or percutaneous coronary angioplasty) before their 66<sup>th</sup> birthday. Recruitment was carried out on a national basis through (i) responses to a sustained UK-wide media campaign (ii) through responses to posters placed within hospitals and GP (family physician) surgeries throughout the UK and (iii) in a pilot-phase contacting patients listed on computer based coronary artery disease databases in the two lead centres (Leeds and Leicester). The recruitment period was from April 1998 to November 2003. The primary purpose was to recruit families with two or more available siblings with CAD for a linkage study called the BHF Family Heart Study (BHF-FHS).<sup>1</sup> During the course of the project we however also recruited subjects with CAD who had a family history of premature CAD (in parents or another sibling) but in whom a further affected sib was not available, for a related project called the GRACE Study.<sup>2</sup> In GRACE unaffected siblings were also recruited. In both studies affected subjects were only included if independent verification of history of CAD was obtained either via examination of hospital records or via the GP. For the WTCCC Study we selected individuals from the combined BHF-FHS and GRACE cohorts, to study 2,000 unrelated cases affected by premature CAD. From each family we selected first for the presence of MI and then on the age of onset of disease. 1,518 (76.4%) individuals come from families included in the BHF-FHS linkage analysis.<sup>1</sup> 470 (23.6%) individuals came from families included in the overlapping GRACE Project.<sup>2</sup>

**WTCCC controls** In the WTCCC Study, two independent European Caucasian control groups were studied. The British 1958 Birth Cohort (58BC, also known as the National Child Development Study), which includes all births in England, Wales and Scotland during one week in 1958, provided 1,504 samples. The second 1,500 (UK Blood Services [UKBS]) controls were selected from a sample of healthy blood donors recruited as part of the WTCCC project. More details about the control cohorts are provided in Ref 3.<sup>3</sup> Briefly, the subjects were about equally divided into males and females. Like the case collection, both control cohorts were geographically widely distributed across the UK.<sup>3</sup> The 58BC samples were by definition of the same age. The UKBS controls had a wide age range with the majority of subjects between 40-59 years.<sup>3</sup> Apart from gender and 10 year age-band other phenotypic information was not available on the control cohorts. There was no evidence of systematic or marked differences in overall allele frequencies between the two control groups.<sup>3</sup> Indeed,

significant associations were obtained for each of the strongly associated regions reported in this paper when control groups were analysed separately (data not shown).

**German cases** MI patients were ascertained by screening of >200,000 patient charts in 17 cardiac in-hospital rehabilitation centers. Index patients were selected from those who had suffered a MI prior to the age of 60 years. If at least one additional first-degree family member (preferentially a sibling) had suffered from MI or had severe coronary artery disease (percutaneous transluminal coronary angioplasty [PTCA] or bypass surgery [CABG]), the family (index patient, available parents and all siblings) was contacted and invited to participate in the study.<sup>4,5</sup> Thus, as in the WTCCC Study, the phenotypic characterisation was based on familial clustering and premature onset of the phenotype (Table 1, main paper). All events in index patients and family members were validated through inspection of hospital charts. All index patients were Caucasians of German descent. The majority (>70%) was recruited in the vicinity of Augsburg and the Southern part of Germany (Clinics in Starnberg/Höhenried, Prien) in the years 1997-2002. Genotyping in German MI Family Study was performed on 875 patients. Like in the WTCCC study, only one subject from each family was selected for genotyping, either the youngest male MI patient, or preferentially, an affected female MI patient.

**German controls** All 1,644 controls subjects were Caucasians of German origin who participated in the population based MONICA/KORA Augsburg study in the years 1994/95 and a follow-up of this survey in the years 2004/05 that was conducted as part of the German National Genome Research Network (NGFN).<sup>6</sup> This survey represents a gender- and age-stratified random sample of all German residents of the Augsburg area and consists of individuals 25 to 74 years of age, with about 300 subjects for each 10-year increment. The population was studied by physical examination, blood testing, and a standardized interview including medical history, physical activity, medication, and personal habits. By questionnaire 22% of the probands reported a positive parental family history for MI.

The Peterborough and Fenland Research Ethic Committee and the University of Regensburg Ethics Committee approved the study protocols for the WTCCC Study and the German MI Family Study, respectively and all participants gave written informed consent.

## 2. Genotyping and quality control

Genotype calling was performed with the Chiamo++ algorithm in the WTCCC Study<sup>3</sup> and with the BRLMM analysis tool in the German MI Family Study, which agree well for SNPs with sufficient genotyping quality.<sup>3</sup> In the WTCCC Study<sup>3</sup>, several filters were applied for exclusion of a subject based on the genotype data. These included a SNP call rate <97% (missingness), heterozygosity >30% or <23% across all SNPs, evidence of non-European ancestry, evidence that the sample was a duplicate or evidence that an individual was a relative of another subject in the study (> 86% IBS sharing). This resulted in the exclusion of 62 case subjects and 66 controls subjects (24 from the 58Bc cohort and 42 from the UKBS cohort) from the study (**Supplementary Table 7**). Some of the filters were also applied to the German study resulting in the exclusion of 13 cases (**Supplementary Table 7**).

Individual SNPs were excluded from a study if any of the following quality criteria was met:  $p \leq 10^{-4}$  in test for deviation from Hardy-Weinberg equilibrium in the control groups (WTCCC 10,945 SNPs; German Study 39,907 SNPs); minor allele frequency (MAF)  $\leq 1\%$  in the cases and controls combined (WTCCC Study 70,365; German Study 62,303 SNPs); SNP call rate  $\leq 98\%$  per study group (WTCCC Study 109,139 SNPs; German Study 178,413 SNPs), trend-test  $p \geq 10^{-3}$  between WTCCC control groups (1,933 SNPs); Some SNPs failed on more than one criterion. We also did not analyse X chromosome SNPs (see below). The combined effect was to reduce the number of evaluated SNPs in WTCCC to 377,857 and in the German Study to 272,602. The higher number in the WTCCC Study reflects the better performance of the Chiamo++ calling algorithm compared with the BRLMM algorithm which particularly reduced the number of SNPs that failed on the SNP call rate and the Hardy-Weinberg criterion.

In addition for all SNPs that came through the above filters and had an association test  $p < 10^{-3}$  the signal intensity plots were directly visually inspected by two independent reviewers in each study to exclude possible artefactual results due to miscalling. Assessment of signal intensity plots for a random 100 SNPs from the WTCCC Study and for 100 SNPs from German Study showed >95% agreement between independent assessors regarding suitability or non-suitability of a SNP based on visual discrimination of the genotypes.

The Affymetrix platform does not assay the Y chromosome. In addition, we excluded analysis of X chromosome SNPs for several reasons. First, the relative weight to be given to males and females in comparisons between cases and controls in the trend test statistic is unclear. In particular, because most loci on the X chromosome are subject to X inactivation, whether males should be treated as if they were homozygous females is unsettled. These issues have a different impact on the calculation and interpretation of the FPRP for X chromosome SNPs compared to the autosomal SNPs. Furthermore, under some of these assumptions the WTCCC had conducted an analysis of the X chromosome SNPs for their seven diseases.<sup>3</sup> No powerful signal emerged from CAD. Therefore in the analysis for this paper, we did not include the X chromosome SNPs.

To further ensure the quality of the genotyping on the Affymetrix 500K array we re-genotyped a total of 26 SNPs covering 6/9 regions including the lead SNPs for chromosome 9 and 6 using the Sequenom's iPLEX assay. Two multiplex reactions were designed and genotyped in 1,152 samples (UKBS controls and CAD cases from the WTCCC Study). The overall concordance rate between genotypes generated by the Affymetrix 500K array and the Sequenom iPLEX assay was 99.8% and did not differ between cases and controls. In addition, we validated the three most significant SNPs (rs1333049, rs6922269, and rs2943634) in 500 cases and 500 controls from the German Study using TaqMan based genotyping. The overall

concordance rate between genotypes generated by the Affymetrix 500K array and TaqMan was between 98.6-98.8% and did not differ between cases and controls.

### **3. Analysis for population sub-structure**

In the WTCCC Study, geographic location was available for all cases (from the seven diseases) and both sets of controls. The WTCCC were therefore able to test for regional differences in allele frequencies and to compare P-values with and without adjustment for region.<sup>3</sup> Only 12 autosomal genetic loci were identified (plus one on the X chromosome) that showed marked geographic variation.<sup>3</sup> None of these regions featured in our analyses on CAD. Over-dispersion of tests for association in the trend tests,  $\lambda$ , was estimated by the method of Devlin & Roeder.<sup>7</sup> The estimate of  $\lambda$  for CAD was 1.06 and ranged from 1.03-1.11 for the other diseases.<sup>3</sup> When we restricted the analysis to SNPs that passed our more stringent criteria (see Section 2), the estimate of  $\lambda$  was little changed at 1.07. In the German study the  $\lambda$  estimate was 1.02. In fact, in a prior study we extensively investigated population stratification in the entire German population.<sup>8</sup> The genetic differentiation is low between North and South Germany ( $F_{st} = 1.7 \times 10^{-4}$ ) and between East and South Germany ( $F_{st} = 5.4 \times 10^{-4}$ ). Such minor degree of population substructure cannot be detected from methods without using prior information of subpopulation membership. With respect to the present study, both cases and controls were ascertained to a large extent in the vicinity of Augsburg, Bavaria. Bavaria is genetically substantially more homogeneous than Germany: It is bounded by the Alps in the South, and it is geographically smaller as it is only one of 16 German federal states.

We thus consider that population sub-structure is negligible in both studies and unlikely to explain the associations observed. The Q-Q-plots for the two studies are shown in

**Supplementary Figure 2.**

#### 4. Additional information on statistical analysis

In the primary analysis all quality checked SNPs that displayed evidence for association with CAD in the WTCCC Study ( $P < 10^{-3}$  from the two-sided Cochran-Armitage trend test) were assessed for the false positive report probability (FPRP).<sup>9</sup> A small FPRP suggests that a SNP is unlikely to be a false positive. This approach employs the P-value, the assumed and estimated effect size, the estimated variability of the effect size and the expected proportion of true positive SNPs.<sup>9</sup> The main reason for preferring ordering by FPRP (rather than P-value alone) is that it can be interpreted without concern for multiple testing.<sup>9</sup> It is therefore easier to judge whether a SNP is worthy of further investigation. P-values are designed for hypothesis testing and not for screening. Having said this, as the P value contributes to the estimation of the FPRP, there is often similarity in the ordering of SNPs by the two methods, and indeed all the loci (on 1q43, 5q21.1, 6q25, 9p21, 16q23, 19q12, and 22q12) identified by the WTCCC in their analysis based on P values<sup>3</sup> were picked up by our approach with two additional loci (on chromosomes 2 and 16) (**Supplementary Table 1**)

The FPRP was calculated by modifying the method of Wacholder et al.<sup>9</sup> to use likelihood ratios in place of the ratio of tail areas. From a systematic literature search we estimate that one in 5,000 SNPs is a true positive.<sup>10</sup> Calculations were based on an alternative odds ratio of 1.25. The results were confirmed by a sensitivity analysis and a full Bayesian analysis of the noteworthy SNPs (**Supplementary Table 8**). As suggested by Wacholder et al.,<sup>9</sup> SNPs with a FPRP of less than 0.5 were further analysed. The first step in this attempt was to search for clustering of significant SNPs, i.e. the lead SNP(s) with the FPRP of less than 0.5 and all SNPs with a  $p < 10^{-3}$  within 100 kb of this lead SNP were considered to represent a single locus. The second step was to test for association of such chromosomal loci with MI in the



German Study. We used the global 5% test-level and the two-sided trend-test for the 9 distinct chromosomal loci harbouring one or multiple SNP(s) with a FPRP of  $<0.5$  and adjustments for multiple testing between SNPs from different chromosomal regions were performed according to Šidak-Holm.<sup>11</sup> Power for validation in the German Study was estimated for each locus for an OR of 1.25 per allele and a significance level of 0.05 using the two-sided trend-test and allowing for multiple testing. Pooled ORs and CIs were calculated using a stratified fixed effects model.

Logistic regression analyses and population attributable fractions (PAF) estimates were determined in the German study using the lead SNP with lowest FPRP from the three replicated regions as described.<sup>12</sup> We performed this analysis in the German Study because the case and control subjects had been extensively phenotyped for cardiovascular risk factors in a comparable fashion<sup>13</sup> and also to reduce the chance of over-inflation of the estimates that would have arisen from carrying out the calculations in the screening (WTCCC) study. We determined the functional form of adjustments for age, gender, their interactions, the PROCAM score<sup>14</sup>, and the Framingham risk score<sup>15</sup> using multivariate fractional polynomials.<sup>16</sup> We used both scores to maximise the adjustment for traditional risk factors and identify the independent risk related to the chromosomal loci. While taking into account standard cardiovascular risk factors, the difference in the fit to the data of models with and without SNP markers was measured using the deviance.<sup>17</sup> Sensitivity analyses using the Framingham risk score or the PROCAM score separately yielded consistent findings (results not shown).

## 5. Haplotype analysis

Haplotype association analysis was performed on the WTCCC data using the THESIAS software implementing the Stochastic-EM algorithm.<sup>18</sup> This allows one to simultaneously estimate haplotype frequencies and haplotype effects under the assumption of additive effects of haplotypes on phenotype. A global test of association between haplotypes and the phenotype was performed by a likelihood ratio test (LRT) ( $\chi^2$  with  $m-1$  df in the case of  $m$  haplotypes). LRT statistic also allowed comparing the effects between subsets of haplotypes, in particular subsets of haplotypes carrying the same allele at a given locus.

### Chromosome 9

In the chromosome 9 region, 19 SNPs were found associated with CAD in the WTCCC Study (**Supplementary Tables 1 and 3**). The 19 SNPs were in strong LD with each other, both in controls and in cases (**Figure 2 (main paper)**). However, two different blocks of LD could be distinguished, with very strong LD within each block (average  $|D'| > 0.90$ ) and moderate LD (average  $|D'| \sim 0.60$ ) between blocks. The first block (block 1) includes SNPs rs643319 to rs10965219 and the second block (block 2) includes SNPs rs9632884 to rs1333049 (**Figure 2 (main paper)**). The SNPs in block 1 generate 5 haplotypes with frequency greater than 2% that explained about 97% of the haplotype diversity of block 1. Only 3 tag SNPs (rs7044859, rs1292136 and rs7865618) were sufficient to characterize these 5 haplotypes. For block 2, two common haplotypes explained more than 90% (about 45% each) of all chromosomes, the estimated haplotype frequency of each of the other inferred haplotypes being less than 1%. Only one tag SNP was therefore required to characterize block 2. SNP rs1333049 was chosen as tagSNP as it was the strongest signal seen in single locus analysis (**Supplementary Table 1**). As a consequence of this structure, haplotype association analysis in relation with the disease was performed using only 4 tag SNPs. The results of this analysis are shown in the

Table below. As expected, the haplotype frequency distribution was highly significantly different between cases and controls ( $\chi^2 = 67.94$  with 6 df,  $P=1 \times 10^{-12}$ ). It can be deduced from the table that the association was mainly due to two yin-yang (TTGG and ACAC) haplotypes whose frequencies were different between cases and controls, but in the opposite direction. By comparison to the TTGG haplotype, the OR for MI associated with the ACAC haplotype was 1.48 [1.34 – 1.64] ( $P=2.1 \times 10^{-14}$ ). Independent analysis of the German dataset identified the same risk haplotypes. The OR for MI associated with the ACAC haplotype compared with the TTGG haplotype was 1.34 (1.12, 1.59),  $P = 0.0012$ .

**Chromosome 9. Association analysis between the main haplotypes derived from the rs7044859, rs12921396, rs7865618 and rs1333049 SNPs and risk of CAD in the WTCCC Study.**

| Polymorphisms      |                    |                    |                    | Haplotype Frequency |       |
|--------------------|--------------------|--------------------|--------------------|---------------------|-------|
| rs7044859<br>(T/A) | rs1292136<br>(C/T) | rs7865618<br>(A/G) | rs1333049<br>(C/G) | Controls            | Cases |
| T                  | C                  | G                  | G                  | 0.042               | 0.037 |
| T                  | T                  | A                  | C                  | 0.055               | 0.059 |
| T                  | T                  | A                  | G                  | 0.042               | 0.037 |
| T                  | T                  | G                  | C                  | 0.074               | 0.078 |
| T                  | T                  | G                  | G                  | 0.333               | 0.271 |
| A                  | C                  | A                  | C                  | 0.324               | 0.386 |
| A                  | C                  | A                  | G                  | 0.107               | 0.098 |

## Chromosome 6

To better clarify the association for chromosome 6, haplotype analysis was performed on the 8 SNPs located in the block of LD around rs6922269 (**Supplementary Figure 1A**). This includes SNP rs4869954 to rs803446. These 8 SNPs generate 6 haplotypes with frequency greater than 2% in the WTCCC dataset that explained about 95% of the haplotype diversity. Only 4 tag SNPs (rs4869954, rs6922269, rs11155760 and rs803446) were sufficient to characterize these 6 haplotypes. Results of the haplotype analysis performed on these 4 tag SNPs are reported in the table below. As expected, the haplotype frequency distribution was highly significantly different between cases and controls ( $\chi^2 = 20.45$  with 5 df,  $P=0.001$ ). In particular, the rs6922269-A allele was carried out by two haplotypes that tended to be more frequent in cases than in controls. These data were compatible with the hypothesis that these two haplotypes were homogeneously associated with increased risk of MI. The same two haplotypes were also identified as disease-associated in the German Study (data not shown).

### Chromosome 6. Association between the main haplotype derived from rs4869954, rs6922269, rs11155760 and rs803446 and risk of CAD in the WTCCC Study

| Polymorphisms      |                    |                     |                   | Haplotype Frequency |       |
|--------------------|--------------------|---------------------|-------------------|---------------------|-------|
| rs4869954<br>(T/C) | rs6922269<br>(G/A) | rs11155760<br>(A/T) | rs803446<br>(G/A) | Controls            | Cases |
| T                  | G                  | A                   | G                 | 0.431               | 0.401 |
| T                  | G                  | A                   | A                 | 0.194               | 0.189 |
| T                  | G                  | T                   | G                 | 0.063               | 0.064 |
| C                  | G                  | A                   | G                 | 0.058               | 0.052 |
| C                  | A                  | A                   | G                 | 0.047               | 0.055 |
| C                  | A                  | T                   | G                 | 0.198               | 0.230 |

## Chromosome 2

Haplotype analysis was also performed on all SNPs located in the LD block around rs2943634. This includes 22 SNPs from rs13395556 to rs10933137 (**Figure 1B, supplement material**). As a consequence of strong LD within this block, 8 haplotypes with frequency greater than 2.5% that explained more than 90% of the whole chromosomes were inferred in the WTCCC Study. These 8 haplotypes were tagged by 7 SNPs (rs13395556, rs2943634, rs2943640, SNP-A-2198190, rs950503, rs2673148 and rs10933137) among which the rs2943634 was the strongest signal seen in single locus analysis. The rs2943634-A allele was carried out by only two haplotypes that were both less frequent in cases than in controls. By symmetry, the 6 haplotypes carrying the rs2943634-G allele were on average more frequent in cases than in controls and detailed haplotype analysis showed that the other associations with MI observed within this block of LD were in fact due to LD with the rs2943634. Analysis of the German Study showed similar results (data not shown).

### Association between haplotypes derived from rs13395556, rs2943634, rs2943640, SNP-A-2198190, rs950503, rs2673148 and rs10933137 and the risk of CAD in the WTCCC Study

| Polymorphisms    |                 |                 |                     |                |                 |                  | Haplotype Frequency |       |
|------------------|-----------------|-----------------|---------------------|----------------|-----------------|------------------|---------------------|-------|
| rs13395556 (C/G) | rs2943634 (C/A) | rs2943640 (C/A) | SNP-A-2198190 (T/C) | rs950503 (G/A) | rs2673148 (C/A) | rs10933137 (C/T) | Controls            | Cases |
| C                | C               | C               | T                   | G              | C               | C                | 0.045               | 0.056 |
| C                | C               | C               | T                   | G              | C               | T                | 0.274               | 0.301 |
| C                | C               | C               | T                   | A              | A               | C                | 0.139               | 0.133 |
| C                | C               | A               | T                   | G              | A               | C                | 0.025               | 0.029 |
| C                | A               | A               | T                   | G              | A               | C                | 0.294               | 0.260 |
| C                | A               | A               | T                   | G              | A               | T                | 0.026               | 0.021 |
| G                | C               | C               | T                   | G              | C               | T                | 0.034               | 0.035 |
| G                | C               | C               | C                   | G              | C               | C                | 0.076               | 0.071 |

## 6. Selection and analysis of candidate genes

We searched PubMed for original articles published before May, 2007 that reported statistically significant associations between specific genotypes and MI or CAD. Search terms included: *myocardial infarction*, *coronary artery disease*, *association study*, *polymorphism*, and *genetic association*. Reports were included if they fulfilled the following criteria: either i) positive association a single large study ( $n > 500$  cases), or ii) positive association in two smaller studies (each  $> 250$  cases), or iii) positive association in more than two studies (each  $> 250$  cases) if another published report was negative or iv) positive association in meta-analyses.<sup>10</sup> We identified a total of 126 genetic variants in 76 genes previously associated with CAD. In addition, we analysed 15 genes mentioned by Morgan et al.<sup>19</sup> that did not meet our selection criteria (16 SNPs).

## 7. Supplementary Tables 1-8

**Supplementary Table 1.** Details on SNPs meeting quality criteria\* in the WTCCC study with  $p < 10^{-3}$  from the trend test and a false positive report probability (FPRP)<sup>#</sup> of  $< 0.5$

| Chromosome | SNP        | Position  | Minor Allele | Risk Allele | MAF (controls) | Genotype Cases |     |      | Genotype Controls |      |      | Per risk allele OR | P-value  | FPRP  |
|------------|------------|-----------|--------------|-------------|----------------|----------------|-----|------|-------------------|------|------|--------------------|----------|-------|
|            |            |           |              |             |                | Min            | Het | Maj  | Min               | Het  | Maj  |                    |          |       |
| 1          | rs2133189  | 219202837 | C            | T           | 0.29           | 136            | 702 | 1088 | 266               | 1192 | 1476 | 1.22 (1.12,1.34)   | 1.38E-05 | 0.473 |
| 1          | rs17465637 | 219211924 | A            | C           | 0.29           | 133            | 702 | 1089 | 265               | 1191 | 1480 | 1.23 (1.12,1.34)   | 1.00E-05 | 0.399 |
| 2          | rs2943634  | 226893585 | A            | C           | 0.34           | 177            | 799 | 936  | 354               | 1304 | 1262 | 1.22 (1.11,1.33)   | 1.19E-05 | 0.466 |
| 5          | rs383830   | 99976881  | A            | T           | 0.22           | 56             | 588 | 1278 | 151               | 990  | 1793 | 1.27 (1.14,1.4)    | 5.72E-06 | 0.269 |
| 5          | rs449650   | 99976917  | T            | G           | 0.22           | 57             | 587 | 1280 | 151               | 990  | 1796 | 1.27 (1.14,1.4)    | 6.74E-06 | 0.296 |
| 5          | rs565928   | 99981589  | T            | C           | 0.22           | 61             | 581 | 1282 | 155               | 988  | 1794 | 1.27 (1.14,1.4)    | 5.71E-06 | 0.270 |
| 6          | rs6922269  | 151345099 | A            | A           | 0.25           | 179            | 775 | 971  | 183               | 1118 | 1637 | 1.23 (1.13,1.35)   | 6.33E-06 | 0.291 |
| 9          | rs643319   | 22007836  | A            | C           | 0.49           | 391            | 945 | 586  | 751               | 1464 | 711  | 1.26 (1.16,1.37)   | 3.13E-08 | 0.002 |
| 9          | rs7044859  | 22008781  | A            | A           | 0.43           | 449            | 972 | 502  | 539               | 1447 | 950  | 1.26 (1.16,1.36)   | 4.82E-08 | 0.004 |
| 9          | rs523096   | 22009129  | G            | A           | 0.46           | 314            | 960 | 649  | 637               | 1442 | 857  | 1.22 (1.13,1.33)   | 1.43E-06 | 0.094 |
| 9          | rs518394   | 22009673  | C            | G           | 0.46           | 310            | 964 | 648  | 631               | 1445 | 856  | 1.23 (1.13,1.33)   | 1.41E-06 | 0.092 |
| 9          | rs10757264 | 22009732  | G            | G           | 0.47           | 509            | 976 | 437  | 623               | 1485 | 828  | 1.24 (1.15,1.35)   | 1.89E-07 | 0.013 |
| 9          | rs10965212 | 22013795  | A            | A           | 0.45           | 513            | 950 | 459  | 603               | 1428 | 895  | 1.29 (1.19,1.4)    | 9.54E-10 | 0.000 |
| 9          | rs1292136  | 22014351  | T            | C           | 0.49           | 382            | 951 | 590  | 746               | 1482 | 708  | 1.28 (1.18,1.39)   | 4.93E-09 | 0.000 |
| 9          | rs7049105  | 22018801  | G            | G           | 0.45           | 506            | 950 | 461  | 593               | 1439 | 897  | 1.29 (1.19,1.4)    | 1.05E-09 | 0.000 |
| 9          | rs10965215 | 22019445  | A            | A           | 0.45           | 506            | 954 | 463  | 588               | 1447 | 902  | 1.29 (1.19,1.4)    | 5.15E-10 | 0.000 |
| 9          | Rs564398   | 22019547  | C            | T           | 0.44           | 277            | 925 | 721  | 583               | 1428 | 921  | 1.27 (1.17,1.38)   | 1.79E-08 | 0.001 |
| 9          | rs7865618  | 22021005  | G            | A           | 0.45           | 289            | 929 | 706  | 619               | 1429 | 888  | 1.29 (1.19,1.4)    | 1.33E-09 | 0.000 |
| 9          | rs10965219 | 22043687  | G            | G           | 0.46           | 530            | 956 | 439  | 613               | 1444 | 876  | 1.31 (1.21,1.43)   | 4.99E-11 | 0.000 |
| 9          | rs9632884  | 22062301  | G            | C           | 0.48           | 381            | 949 | 592  | 818               | 1422 | 693  | 1.35 (1.24,1.46)   | 3.80E-13 | 0.000 |
| 9          | rs6475606  | 22071850  | C            | T           | 0.47           | 380            | 957 | 588  | 830               | 1425 | 683  | 1.37 (1.26,1.48)   | 4.39E-14 | 0.000 |
| 9          | rs4977574  | 22088574  | A            | G           | 0.48           | 382            | 937 | 605  | 804               | 1435 | 698  | 1.35 (1.24,1.46)   | 4.28E-13 | 0.000 |
| 9          | rs2891168  | 22088619  | A            | G           | 0.48           | 383            | 938 | 605  | 803               | 1435 | 698  | 1.35 (1.24,1.46)   | 5.90E-13 | 0.000 |
| 9          | rs1333042  | 22093813  | A            | G           | 0.49           | 365            | 939 | 617  | 770               | 1426 | 724  | 1.34 (1.23,1.45)   | 2.45E-12 | 0.000 |
| 9          | rs1333048  | 22115347  | A            | C           | 0.49           | 354            | 951 | 619  | 781               | 1423 | 730  | 1.36 (1.25,1.48)   | 1.28E-13 | 0.000 |
| 9          | rs1333049  | 22115503  | G            | C           | 0.47           | 378            | 960 | 586  | 829               | 1431 | 676  | 1.37 (1.27,1.49)   | 1.80E-14 | 0.000 |
| 16         | rs8055236  | 81769899  | T            | G           | 0.20           | 42             | 539 | 1342 | 133               | 895  | 1907 | 1.27 (1.14,1.41)   | 9.73E-06 | 0.382 |
| 16         | Rs889595   | 85069581  | T            | A           | 0.30           | 142            | 709 | 1068 | 262               | 1233 | 1432 | 1.23 (1.12,1.34)   | 1.13E-05 | 0.421 |
| 19         | rs7250581  | 34756236  | A            | G           | 0.22           | 75             | 551 | 1295 | 144               | 997  | 1779 | 1.26 (1.14,1.39)   | 9.12E-06 | 0.357 |
| 22         | Rs688034   | 25014189  | T            | T           | 0.31           | 265            | 832 | 823  | 276               | 1266 | 1386 | 1.22 (1.12,1.33)   | 6.90E-06 | 0.334 |

**Legend to Supplementary Table 1:** \*The quality criteria are described in Supplementary Materials section 2. <sup>#</sup> The calculation of the false positive report probability (FPRP) is described in Supplementary Materials section 4. MAF, minor allele frequency; OR, odds

ratio (95% CI); Min (Maj), number of subjects being homozygous for the minor (major) allele. Het, number of heterozygous subjects. Bold horizontal lines mark distinct chromosomal regions.



**Supplementary Table 2.** Details on SNPs meeting quality criteria\* which show association in the WTCCC Study but not in the German MI Family Study

| Chromosome | SNP        | Position  | Risk Allele | WTCCC        |                 |     |      |                    |      |      |                  |          | German MI Study |                 |     |     |                   |     |      |                  |         | FPRP  |
|------------|------------|-----------|-------------|--------------|-----------------|-----|------|--------------------|------|------|------------------|----------|-----------------|-----------------|-----|-----|-------------------|-----|------|------------------|---------|-------|
|            |            |           |             | MAF Controls | Genotypes Cases |     |      | Genotypes Controls |      |      | Per Allele OR    | P value  | MAF Controls    | Genotypes Cases |     |     | Genotype Controls |     |      | Per Allele OR    | P-value |       |
|            |            |           |             |              | Min             | Het | Maj  | Min                | Het  | Maj  |                  |          |                 | Min             | Het | Maj | Min               | Het | Maj  |                  |         |       |
| 1          | rs17672135 | 236771637 | T           | 0.13         | 28              | 357 | 1530 | 30                 | 721  | 2163 | 1.29 (1.13,1.47) | 1.04E-04 | 0.13            | 14              | 194 | 627 | 24                | 357 | 1228 | 0.94 (0.79,1.12) | 0.48    | 0.999 |
| 5          | rs383830   | 99976881  | T           | 0.22         | 56              | 588 | 1278 | 151                | 990  | 1793 | 1.27 (1.14,1.4)  | 5.72E-06 | 0.20            | 29              | 261 | 460 | 73                | 511 | 1033 | 0.94 (0.81,1.1)  | 0.45    | 0.996 |
| 16         | rs8055236  | 81769899  | G           | 0.20         | 42              | 539 | 1342 | 133                | 895  | 1907 | 1.27 (1.14,1.41) | 9.73E-06 | 0.19            | 28              | 261 | 559 | 69                | 470 | 1086 | 1.00 (0.86,1.16) | 0.99    | 0.978 |
| 16         | rs889595   | 85069581  | A           | 0.30         | 142             | 709 | 1068 | 262                | 1233 | 1432 | 1.23 (1.12,1.34) | 1.13E-05 | 0.30            | 63              | 374 | 411 | 124               | 707 | 766  | 1.02(0.89,1.17)  | 0.75    | 0.983 |
| 19         | rs7250581  | 34756236  | G           | 0.22         | 75              | 551 | 1295 | 144                | 997  | 1779 | 1.26(1.14,1.39)  | 9.12E-06 | 0.18            | 28              | 267 | 551 | 45                | 477 | 1085 | 0.91(0.78,1.06)  | 0.21    | 0.999 |
| 22         | rs688034   | 25014189  | T           | 0.31         | 265             | 832 | 823  | 276                | 1266 | 1386 | 1.22 (1.12,1.33) | 6.90E-06 | 0.33            | 90              | 401 | 368 | 165               | 740 | 737  | 1.06 (0.93,1.2)  | 0.37    | 0.903 |

\*The quality criteria are described in Supplementary Materials section 2. FPRP, false positive report probability calculated as described in Supplementary Materials Section 4. MAF, minor allele frequency; OR, odds ratio (95% CI). Min (Maj), number of subjects being homozygous for the minor (major) allele. Het, number of heterozygous subjects. Power to replicate the SNPs in the German study using the global significance level of 5%, the two-sided trend-test and assuming a true OR of 1.25 was: rs17672135 (43%), rs383830 (55%), rs8055236 (51%), rs889595 (73%), rs7250581 (55%) and rs688034 (80%).

**Supplementary Table 3. Combined Analysis:** Details on SNPs meeting quality criteria\* with a false positive report probability (FPRP)<sup>#</sup> of < 20% from a combined analysis of SNPs with  $p < 10^{-3}$  in both the WTCCC and German MI Family Study

|            |            |           |              |             | WTCCC        |                 |     |      |                    |      |      |                    |          | German MI study |                 |     |     |                    |     |      |                    |          | Pooled             |          |       |
|------------|------------|-----------|--------------|-------------|--------------|-----------------|-----|------|--------------------|------|------|--------------------|----------|-----------------|-----------------|-----|-----|--------------------|-----|------|--------------------|----------|--------------------|----------|-------|
| Chromosome | SNP        | Position  | Minor Allele | Risk Allele | MAF Controls | Genotypes Cases |     |      | Genotypes Controls |      |      | Per Risk Allele OR | P-value  | MAF Controls    | Genotypes Cases |     |     | Genotypes Controls |     |      | Per Risk Allele OR | P-value  | Per Risk Allele OR | P-value  | FPRP  |
|            |            |           |              |             |              | Min             | Het | Maj  | Min                | Het  | Maj  |                    |          |                 | Min             | Het | Maj | Min                | Het | Maj  |                    |          |                    |          |       |
| 1          | rs599839   | 109534208 | G            | A           | 0.23         | 76              | 587 | 1260 | 144                | 1052 | 1740 | 1.24 (1.12,1.38)   | 2.19E-05 | 0.22            | 26              | 208 | 522 | 82                 | 574 | 986  | 1.39 (1.19,1.63)   | 3.17E-05 | 1.29 (1.18,1.4)    | 4.05E-09 | 0.001 |
| 1          | rs3008621  | 219192441 | A            | G           | 0.14         | 24              | 410 | 1488 | 68                 | 712  | 2153 | 1.25 (1.1,1.41)    | 3.48E-04 | 0.15            | 7               | 174 | 645 | 30                 | 405 | 1158 | 1.34 (1.12,1.61)   | 1.67E-03 | 1.28 (1.15,1.41)   | 1.92E-06 | 0.144 |
| 1          | rs17465637 | 219211924 | A            | C           | 0.29         | 133             | 702 | 1089 | 265                | 1191 | 1480 | 1.23 (1.12,1.34)   | 1.00E-05 | 0.26            | 49              | 306 | 502 | 115                | 627 | 889  | 1.15 (1.01,1.32)   | 3.82E-02 | 1.20 (1.12,1.3)    | 1.27E-06 | 0.131 |
| 2          | rs2943634  | 226893585 | A            | C           | 0.34         | 177             | 799 | 936  | 354                | 1304 | 1262 | 1.22 (1.11,1.33)   | 1.19E-05 | 0.36            | 96              | 362 | 397 | 221                | 755 | 664  | 1.20 (1.06,1.35)   | 4.33E-03 | 1.21 (1.13,1.3)    | 1.61E-07 | 0.019 |
| 6          | rs6922269  | 151345099 | A            | A           | 0.25         | 179             | 775 | 971  | 183                | 1118 | 1637 | 1.23 (1.13,1.35)   | 6.33E-06 | 0.26            | 69              | 373 | 410 | 117                | 607 | 915  | 1.24 (1.09,1.41)   | 1.14E-03 | 1.23 (1.15,1.33)   | 2.90E-08 | 0.002 |
| 9          | rs643319   | 22007836  | A            | C           | 0.51         | 391             | 945 | 586  | 751                | 1464 | 711  | 1.26 (1.16,1.37)   | 3.13E-08 | 0.49            | 144             | 376 | 236 | 363                | 863 | 407  | 1.22 (1.08,1.38)   | 1.84E-03 | 1.25 (1.16,1.34)   | 2.21E-10 | 0.000 |
| 9          | rs7044859  | 22008781  | A            | A           | 0.43         | 449             | 972 | 502  | 539                | 1447 | 950  | 1.26 (1.16,1.36)   | 4.82E-08 | 0.45            | 194             | 343 | 187 | 295                | 853 | 471  | 1.28 (1.13,1.45)   | 1.42E-04 | 1.26 (1.18,1.35)   | 2.90E-11 | 0.000 |
| 9          | rs523096   | 22009129  | G            | A           | 0.46         | 314             | 960 | 649  | 637                | 1442 | 857  | 1.22 (1.13,1.33)   | 1.43E-06 | 0.45            | 126             | 360 | 272 | 304                | 867 | 465  | 1.22 (1.08,1.39)   | 1.79E-03 | 1.22 (1.14,1.31)   | 8.64E-09 | 0.001 |
| 9          | rs518394   | 22009673  | C            | G           | 0.46         | 310             | 964 | 648  | 631                | 1445 | 856  | 1.23 (1.13,1.33)   | 1.41E-06 | 0.45            | 115             | 354 | 274 | 293                | 823 | 459  | 1.26 (1.11,1.43)   | 3.86E-04 | 1.24 (1.15,1.32)   | 2.10E-09 | 0.000 |
| 9          | rs10757264 | 22009732  | G            | G           | 0.47         | 509             | 976 | 437  | 623                | 1485 | 828  | 1.24 (1.15,1.35)   | 1.89E-07 | 0.48            | 208             | 384 | 170 | 351                | 881 | 411  | 1.20 (1.06,1.36)   | 4.20E-03 | 1.23 (1.15,1.32)   | 3.02E-09 | 0.000 |
| 9          | rs10965212 | 22013795  | A            | A           | 0.45         | 513             | 950 | 459  | 603                | 1428 | 895  | 1.29 (1.19,1.4)    | 9.54E-10 | 0.47            | 228             | 417 | 205 | 344                | 846 | 440  | 1.19 (1.06,1.34)   | 3.70E-03 | 1.26 (1.18,1.34)   | 2.18E-11 | 0.000 |
| 9          | rs1292136  | 22014351  | T            | C           | 0.51         | 382             | 951 | 590  | 746                | 1482 | 708  | 1.28 (1.18,1.39)   | 4.93E-09 | 0.49            | 143             | 380 | 234 | 361                | 865 | 410  | 1.21 (1.07,1.37)   | 2.93E-03 | 1.26 (1.17,1.35)   | 6.39E-11 | 0.000 |
| 9          | rs7049105  | 22018801  | G            | G           | 0.45         | 506             | 950 | 461  | 593                | 1439 | 897  | 1.29 (1.19,1.4)    | 1.05E-09 | 0.47            | 201             | 365 | 171 | 346                | 836 | 437  | 1.22 (1.08,1.38)   | 1.83E-03 | 1.27 (1.18,1.36)   | 9.21E-12 | 0.000 |
| 9          | rs10965215 | 22019445  | A            | A           | 0.45         | 506             | 954 | 463  | 588                | 1447 | 902  | 1.29 (1.19,1.4)    | 5.15E-10 | 0.47            | 211             | 375 | 176 | 343                | 854 | 447  | 1.25 (1.11,1.42)   | 3.63E-04 | 1.28 (1.2,1.37)    | 8.28E-13 | 0.000 |
| 9          | rs564398   | 22019547  | C            | T           | 0.44         | 277             | 925 | 721  | 583                | 1428 | 921  | 1.27 (1.17,1.38)   | 1.79E-08 | 0.42            | 108             | 348 | 305 | 264                | 842 | 530  | 1.23 (1.08,1.4)    | 1.31E-03 | 1.26 (1.17,1.35)   | 8.58E-11 | 0.000 |
| 9          | rs7865618  | 22021005  | G            | A           | 0.45         | 289             | 929 | 706  | 619                | 1429 | 888  | 1.29 (1.19,1.4)    | 1.33E-09 | 0.43            | 138             | 390 | 331 | 286                | 842 | 511  | 1.20 (1.07,1.36)   | 2.71E-03 | 1.26 (1.18,1.35)   | 1.90E-11 | 0.000 |
| 9          | rs10965219 | 22043687  | G            | G           | 0.46         | 530             | 956 | 439  | 613                | 1444 | 876  | 1.31 (1.21,1.43)   | 4.99E-11 | 0.48            | 225             | 407 | 195 | 349                | 826 | 425  | 1.19 (1.05,1.34)   | 5.27E-03 | 1.27 (1.19,1.36)   | 2.33E-12 | 0.000 |
| 9          | rs9632884  | 22062301  | G            | C           | 0.52         | 381             | 949 | 592  | 818                | 1422 | 693  | 1.35 (1.24,1.46)   | 3.80E-13 | 0.47            | 247             | 424 | 179 | 355                | 818 | 453  | 1.33 (1.18,1.49)   | 2.67E-06 | 1.34 (1.26,1.44)   | 4.68E-18 | 0.000 |

|    |            |          |   |   |      |     |     |      |     |      |      |                  |          |      |     |     |     |     |     |      |                  |          |                  |          |       |
|----|------------|----------|---|---|------|-----|-----|------|-----|------|------|------------------|----------|------|-----|-----|-----|-----|-----|------|------------------|----------|------------------|----------|-------|
| 9  | rs6475606  | 22071850 | C | T | 0.53 | 380 | 957 | 588  | 830 | 1425 | 683  | 1.37 (1.26,1.48) | 4.39E-14 | 0.47 | 231 | 443 | 186 | 351 | 824 | 461  | 1.28 (1.13,1.44) | 5.16E-05 | 1.34 (1.25,1.43) | 1.45E-17 | 0.000 |
| 9  | rs4977574  | 22088574 | A | G | 0.52 | 382 | 937 | 605  | 804 | 1435 | 698  | 1.35 (1.24,1.46) | 4.28E-13 | 0.47 | 239 | 452 | 169 | 354 | 826 | 463  | 1.36 (1.2,1.53)  | 5.20E-07 | 1.35 (1.26,1.45) | 1.03E-18 | 0.000 |
| 9  | rs2891168  | 22088619 | A | G | 0.52 | 383 | 938 | 605  | 803 | 1435 | 698  | 1.35 (1.24,1.46) | 5.90E-13 | 0.47 | 238 | 451 | 169 | 351 | 827 | 462  | 1.36 (1.2,1.53)  | 4.87E-07 | 1.35 (1.26,1.44) | 1.34E-18 | 0.000 |
| 9  | rs1333049  | 22115503 | G | C | 0.53 | 378 | 960 | 586  | 829 | 1431 | 676  | 1.37 (1.27,1.49) | 1.80E-14 | 0.48 | 233 | 453 | 158 | 349 | 831 | 425  | 1.33 (1.18,1.51) | 3.40E-06 | 1.36 (1.27,1.46) | 2.91E-19 | 0.000 |
| 10 | rs622472   | 44069217 | C | A | 0.14 | 30  | 394 | 1500 | 46  | 711  | 2181 | 1.19 (1.05,1.34) | 7.00E-03 | 0.16 | 11  | 144 | 603 | 43  | 431 | 1168 | 1.51 (1.25,1.82) | 1.20E-05 | 1.28 (1.16,1.42) | 1.84E-06 | 0.179 |
| 10 | rs687175   | 44071916 | C | T | 0.13 | 29  | 384 | 1513 | 41  | 708  | 2186 | 1.20 (1.06,1.36) | 3.76E-03 | 0.16 | 11  | 141 | 608 | 43  | 427 | 1167 | 1.54 (1.27,1.85) | 5.93E-06 | 1.30 (1.17,1.44) | 4.77E-07 | 0.071 |
| 10 | rs535949   | 44072336 | T | G | 0.13 | 27  | 380 | 1513 | 41  | 698  | 2185 | 1.21 (1.07,1.37) | 2.85E-03 | 0.16 | 11  | 142 | 604 | 43  | 427 | 1163 | 1.52 (1.26,1.84) | 8.56E-06 | 1.30 (1.18,1.45) | 4.06E-07 | 0.062 |
| 10 | rs671765   | 44072982 | G | A | 0.13 | 29  | 383 | 1512 | 42  | 706  | 2186 | 1.20 (1.06,1.37) | 3.49E-03 | 0.16 | 11  | 142 | 606 | 42  | 430 | 1166 | 1.53 (1.27,1.84) | 7.55E-06 | 1.30 (1.17,1.44) | 5.10E-07 | 0.073 |
| 10 | rs501120   | 44073873 | C | T | 0.13 | 21  | 375 | 1509 | 33  | 695  | 2176 | 1.24 (1.09,1.41) | 1.31E-03 | 0.16 | 11  | 139 | 602 | 43  | 423 | 1154 | 1.54 (1.28,1.86) | 5.28E-06 | 1.33 (1.2,1.48)  | 9.46E-08 | 0.023 |
| 10 | rs1746048  | 44095830 | T | C | 0.13 | 29  | 381 | 1514 | 41  | 706  | 2184 | 1.21 (1.07,1.37) | 2.96E-03 | 0.16 | 14  | 162 | 684 | 42  | 425 | 1169 | 1.47 (1.23,1.76) | 1.61E-05 | 1.29 (1.17,1.43) | 5.73E-07 | 0.069 |
| 10 | rs1746049  | 44096316 | T | C | 0.13 | 28  | 373 | 1520 | 39  | 695  | 2201 | 1.21 (1.07,1.37) | 3.17E-03 | 0.15 | 14  | 158 | 689 | 40  | 418 | 1186 | 1.46 (1.22,1.75) | 2.64E-05 | 1.29 (1.16,1.43) | 8.77E-07 | 0.097 |
| 15 | rs17228212 | 65245693 | C | C | 0.30 | 211 | 856 | 856  | 250 | 1235 | 1451 | 1.19 (1.09,1.3)  | 1.18E-04 | 0.26 | 81  | 362 | 417 | 121 | 600 | 923  | 1.26 (1.11,1.44) | 3.09E-04 | 1.21 (1.13,1.3)  | 1.98E-07 | 0.018 |

\*The quality criteria are described in Supplementary Materials section 2. # The calculation of the false positive report probability (FPRP) is described in Supplementary Materials section 4. MAF, minor allele frequency. OR, odds ratio (with 95% CI). Min (Maj), number of subjects being homozygous for the minor (major) allele. Het, number of heterozygous subjects. The pooled OR and p value are from a stratified fixed effects model.

**TABLE 4. Comparison of the effects of the seven associated loci separately in subjects with a history of myocardial infarction (MI, n = 1377) and with subjects with history of Coronary Artery Disease only (CAD, n = 549) in the WTCCC Study**

| CHR. | POSITION  | SNP               | MINOR ALLELE | RISK ALLELE | OR MI<br>(95% CI) | P-VALUE<br>MI          | OR CAD<br>(95% CI) | P-VALUE<br>CAD         | P-VALUE<br>FOR<br>HETEROGE<br>NEITY OF<br>RISK |
|------|-----------|-------------------|--------------|-------------|-------------------|------------------------|--------------------|------------------------|------------------------------------------------|
| 1    | 109534208 | <b>rs599839</b>   | G            | A           | 1.24 (1.11,1.39)  | $1.47 \times 10^{-4}$  | 1.25 (1.06,1.48)   | $6.21 \times 10^{-3}$  | 0.95                                           |
| 1    | 219211924 | <b>rs17465637</b> | A            | C           | 1.24 (1.12,1.38)  | $2.36 \times 10^{-5}$  | 1.19 (1.03,1.37)   | $1.81 \times 10^{-2}$  | 0.58                                           |
| 2    | 226893585 | <b>rs2943634</b>  | A            | C           | 1.21 (1.10,1.33)  | $1.44 \times 10^{-4}$  | 1.24 (1.08,1.42)   | $2.60 \times 10^{-3}$  | 0.74                                           |
| 6    | 151345099 | <b>rs6922269</b>  | A            | A           | 1.24 (1.12,1.38)  | $2.39 \times 10^{-5}$  | 1.21 (1.05,1.39)   | $1.06 \times 10^{-2}$  | 0.69                                           |
| 9    | 22115503  | <b>rs1333049</b>  | C            | C           | 1.35 (1.23,1.48)  | $1.00 \times 10^{-10}$ | 1.44 (1.27,1.64)   | $2.47 \times 10^{-14}$ | 0.32                                           |
| 10   | 44073873  | <b>rs501120</b>   | C            | T           | 1.20 (1.04,1.39)  | $1.17 \times 10^{-2}$  | 1.34 (1.08,1.66)   | $6.76 \times 10^{-3}$  | 0.38                                           |
| 15   | 65245693  | <b>rs17228212</b> | C            | C           | 1.12 (1.01,1.23)  | $2.94 \times 10^{-2}$  | 1.39 (1.21,1.59)   | $3.24 \times 10^{-6}$  | 0.004                                          |

**Legend to Table 4:** See legends to Supplementary Tables 2 and 3 for explanation of terms. Odds ratios (OR) with 95% CI are per copy of the risk allele without adjustments for covariates. The P value for interaction is from a test of whether the effect in subjects with MI is different from that in subjects with CAD.

**TABLE 5 Comparison of effects of the seven associated loci in men and women separately from combined analysis of the WTCCC Study and German Study**

| CHR. | POSITION  | SNP               | MINOR ALLELE | RISK ALLELE | OR MALE (95% CI) | P VALUE MALE           | OR FEMALE (95% CI) | P VALUE FEMALE        | P VALUE INTER-ACTION |
|------|-----------|-------------------|--------------|-------------|------------------|------------------------|--------------------|-----------------------|----------------------|
| 1    | 109534208 | <b>rs599839</b>   | G            | A           | 1.36 (1.16,1.59) | $1.33 \times 10^{-4}$  | 1.27 (1.14,1.41)   | $7.61 \times 10^{-6}$ | 0.50                 |
| 1    | 219211924 | <b>rs17465637</b> | A            | C           | 1.24 (1.12,1.36) | $1.15 \times 10^{-5}$  | 1.19 (1.04,1.37)   | $1.24 \times 10^{-2}$ | 0.67                 |
| 2    | 226893585 | <b>rs2943634</b>  | A            | C           | 1.20 (1.10,1.32) | $4.48 \times 10^{-5}$  | 1.22 (1.07,1.39)   | $2.30 \times 10^{-3}$ | 0.86                 |
| 6    | 151345099 | <b>rs6922269</b>  | A            | A           | 1.24 (1.13,1.37) | $4.56 \times 10^{-6}$  | 1.23 (1.07,1.41)   | $3.13 \times 10^{-3}$ | 0.87                 |
| 9    | 22115503  | <b>rs1333049</b>  | C            | C           | 1.35 (1.24,1.47) | $7.03 \times 10^{-12}$ | 1.35 (1.19,1.52)   | $1.90 \times 10^{-6}$ | 0.99                 |
| 10   | 44073873  | <b>rs501120</b>   | C            | T           | 1.30 (1.14,1.48) | $8.20 \times 10^{-5}$  | 1.56 (1.27,1.91)   | $1.30 \times 10^{-5}$ | 0.14                 |
| 15   | 65245693  | <b>rs17228212</b> | C            | C           | 1.24 (1.13,1.36) | $7.68 \times 10^{-6}$  | 1.16 (1.02,1.33)   | $2.56 \times 10^{-2}$ | 0.47                 |

**Legend to Table 5:** See legends to Supplementary Tables 2 and 3 for explanation of terms. There were 2,117 male cases and 2,259 male controls and 684 female cases and 2,323 female controls. The odds ratios (OR) with 95% CI are per copy of the risk allele without adjustments for covariates. The P value for interaction is from a test of whether the effect in men and women is different.

TABLE 6: Candidate gene analysis

| GeneSymbol | Variant             | AlternativeSNP | r <sup>2</sup> | D'   | Code <sup>#</sup> | WTCCCstudy |      |                 |         | Germandata |      |                  |         |  |
|------------|---------------------|----------------|----------------|------|-------------------|------------|------|-----------------|---------|------------|------|------------------|---------|--|
|            |                     |                |                |      |                   | QC         | MAF  | OR              | P value | QC         | MAF  | OR               | p value |  |
| ABCA1      | Cys564Thr           |                |                |      | 3                 |            |      |                 |         |            |      |                  |         |  |
| ABCA1      | Lys1587Arg          | SNP_A-2072988  |                |      | 1                 | N          |      |                 |         | Y          | 0.26 | 0.76 [0.66,0.88] | 0.0001  |  |
| ABCA1      | Arg219Lys           | rs2472433      | 1.00           |      | 2                 | Y          | 0.26 | 1.02[0.92,1.13] | 0.85    | Y          | 0.28 | 0.79 [0.69,0.91] | 0.001   |  |
| ADD1       | Gly460Trp           | rs2239728      | 0.95           |      | 2                 | Y          | 0.20 | 1.01[0.90,1.13] | 0.50    | Y          | 0.19 | 1.07 [0.92,1.24] | 0.39    |  |
| ADD1       |                     | rs4690001      | 0.87           |      | 2                 | Y          | 0.21 | 1.02[0.91,1.14] | 0.53    | Y          | 0.21 | 1.05 [0.91,1.22] | 0.5     |  |
| ADD1       |                     | rs1263345      | 0.91           |      | 2                 | Y          | 0.20 | 1.00[0.89,1.12] | 0.37    | Y          | 0.20 | 1.03 [0.88,1.20] | 0.71    |  |
| ADD1       |                     | rs17833250     |                | 1.00 | 2                 | Y          | 0.28 | 0.98[0.88,1.08] | 0.67    | Y          | 0.31 | 0.90 [0.78,1.02] | 0.1     |  |
| ADD1       |                     | rs10026792     |                | 1.00 | 2                 | Y          | 0.29 | 0.97[0.87,1.07] | 0.49    | Y          | 0.32 | 0.91 [0.79,1.04] | 0.15    |  |
| ADD1       |                     | rs6600769      |                | 1.00 | 2                 | Y          | 0.28 | 0.99[0.90,1.10] | 0.92    | Y          | 0.30 | 0.88 [0.77,1.01] | 0.07    |  |
| ADD1       |                     | rs422734       |                | 1.00 | 2                 | Y          | 0.29 | 1.06[0.96,1.17] | 0.18    | N          |      |                  |         |  |
| ADD1       |                     | rs16843589     |                | 1.00 | 2                 | N          |      |                 |         | N          |      |                  |         |  |
| ADD1       |                     | rs1014947      |                | 1.00 | 2                 | Y          | 0.28 | 0.99[0.89,1.09] | 0.84    | Y          | 0.30 | 0.86 [0.75,0.98] | 0.02    |  |
| ADH1C      | Ile350Val/Phe350Val |                |                |      | 3                 |            |      |                 |         |            |      |                  |         |  |
| ACDC       | +276G/T             | rs3821799      |                | 1.00 | 2                 | Y          | 0.44 | 0.92[0.84,1.01] | 0.54    | Y          | 0.45 | 0.99 [0.88,1.13] | 0.92    |  |
| ACDC       |                     | rs3774261      |                | 1.00 | 2                 | Y          | 0.38 | 0.92[0.84,1.01] | 0.25    | Y          | 0.39 | 0.97 [0.86,1.11] | 0.68    |  |
| ACDC       |                     | rs6773957      |                | 1.00 | 2                 | Y          | 0.38 | 0.91[0.83,1.00] | 0.20    | Y          | 0.39 | 0.97 [0.85,1.10] | 0.65    |  |
| ACDC       | Gly15Gly            |                |                |      | 3                 |            |      |                 |         |            |      |                  |         |  |
| ADRB1      | Arg389Gly           |                |                |      | 3                 |            |      |                 |         |            |      |                  |         |  |
| ADRB2      | Glu27Gln            |                |                |      | 3                 |            |      |                 |         |            |      |                  |         |  |
| ADRB2      | Thr164Ile           |                |                |      | 3                 |            |      |                 |         |            |      |                  |         |  |
| ADRB2      | Gly16Arg            |                |                |      | 3                 |            |      |                 |         |            |      |                  |         |  |
| ADRB3      | Arg64Trp            |                |                |      | 3                 |            |      |                 |         |            |      |                  |         |  |
| AGER       | -429C/T             |                |                |      | 3                 |            |      |                 |         |            |      |                  |         |  |
| AGER       | -374T/A             | rs1035798      | 0.94           |      | 2                 | Y          | 0.21 | 0.96[0.86,1.07] | 0.88    | N          |      |                  |         |  |
| AGER       | Gly82Ser            |                |                |      | 3                 |            |      |                 |         |            |      |                  |         |  |
| AGT        | Thr174Met           | rs11122577     |                | 1.00 | 2                 | Y          | 0.16 | 1.06[0.94,1.20] | 0.59    | Y          | 0.18 | 1.06 [0.90,1.25] | 0.48    |  |
| AGT        | Thr235Met           | rs11122577     |                | 1.00 | 2                 | Y          | 0.16 | 1.06[0.94,1.20] | 0.59    | Y          | 0.18 | 1.06 [0.90,1.25] | 0.48    |  |
| AGT        |                     | rs11122576     |                | 1.00 | 2                 | Y          | 0.09 | 1.03[0.87,1.21] | 0.69    | N          |      |                  |         |  |
| AGT        |                     | rs2071406      |                | 1.00 | 2                 | Y          | 0.04 | 1.18[0.92,1.50] | 0.14    | Y          | 0.05 | 0.84 [0.62,1.11] | 0.2     |  |
| AGT        |                     | rs2071404      |                | 1.00 | 2                 | Y          | 0.11 | 1.02[0.88,1.18] | 0.81    | Y          | 0.12 | 1.22 [1.01,1.47] | 0.03    |  |



|         |           |               |      |   |   |      |                 |       |   |      |                  |      |
|---------|-----------|---------------|------|---|---|------|-----------------|-------|---|------|------------------|------|
| COMT    | Val158Met | rs4646312     | 1.00 | 2 | Y | 0.40 | 0.90[0.82,0.98] | 0.01  | Y | 0.37 | 0.90 [0.79,1.01] | 0.08 |
| COMT    |           | rs4633        | 0.97 | 2 | Y | 0.48 | 0.87[0.80,0.95] | 0.001 | Y | 0.46 | 0.96 [0.85,1.09] | 0.53 |
| CPB2    | Ala169Thr | rs9526140     | 1.00 | 2 | Y | 0.33 | 1.01[0.92,1.11] | 0.68  | Y | 0.33 | 0.93 [0.82,1.06] | 0.29 |
| CPB2    |           | rs9534307     | 1.00 | 2 | Y | 0.33 | 1.01[0.92,1.12] | 0.62  | Y | 0.33 | 0.94 [0.82,1.07] | 0.33 |
| CPB2    |           | rs9316180     | 1.00 | 2 | N |      |                 |       | N |      |                  |      |
| CPB2    |           | rs9316179     | 1.00 | 2 | Y | 0.33 | 1.01[0.92,1.11] | 0.79  | N |      |                  |      |
| CPB2    |           | rs9567613     | 1.00 | 2 | Y | 0.33 | 1.02[0.92,1.12] | 0.62  | Y | 0.33 | 0.95 [0.83,1.08] | 0.4  |
| CPB2    |           | rs11618062    | 1.00 | 2 | Y | 0.33 | 1.01[0.92,1.11] | 0.67  | Y | 0.33 | 0.94 [0.82,1.07] | 0.31 |
| CPB2    |           | rs953412      | 1.00 | 2 | Y | 0.08 | 1.07[0.90,1.26] | 0.58  | N |      |                  |      |
| CPB2    |           | rs7337140     | 1.00 | 2 | Y | 0.25 | 1.07[0.97,1.19] | 0.13  | N |      |                  |      |
| CPB2    |           | rs1548325     | 1.00 | 2 | Y | 0.25 | 1.02[0.92,1.13] | 0.52  | N |      |                  |      |
| CPB2    |           | rs1926446     | 1.00 | 2 | Y | 0.28 | 1.03[0.93,1.14] | 0.49  | Y | 0.29 | 1.00 [0.88,1.14] | 1    |
| CPB2    |           | rs1926447     | 1.00 | 2 | Y | 0.28 | 1.03[0.93,1.14] | 0.46  | N |      |                  |      |
| CPB2    |           | rs1022952     | 1.00 | 2 | N |      |                 |       | N |      |                  |      |
| CPB2    |           | rs9567621     | 1.00 | 2 | Y | 0.25 | 1.08[0.97,1.20] | 0.09  | N |      |                  |      |
| CPB2    |           | rs1409432     | 1.00 | 2 | Y | 0.25 | 1.08[0.97,1.19] | 0.10  | Y | 0.25 | 0.95 [0.83,1.09] | 0.47 |
| CX3CR1  | Val249Ile | rs11713282    | 1.00 | 2 | Y | 0.27 | 1.03[0.93,1.14] | 0.83  | N |      |                  |      |
| CX3CR1  | Thr280Met | rs11713282    | 1.00 | 2 | Y | 0.27 | 1.03[0.93,1.14] | 0.83  | N |      |                  |      |
| CYBA    | His72Tyr  |               |      | 3 |   |      |                 |       |   |      |                  |      |
| CYBA    | 640A/G    |               |      | 3 |   |      |                 |       |   |      |                  |      |
| CYP11B2 | -344C/T   | rs7831617     | 1.00 | 2 | Y | 0.44 | 0.97[0.88,1.06] | 0.30  | Y | 0.45 | 0.97 [0.85,1.10] | 0.6  |
| CYP11A1 | -163A/C   |               |      | 3 |   |      |                 |       |   |      |                  |      |
| CYP11A2 |           |               |      | 3 |   |      |                 |       |   |      |                  |      |
| CYP2C9  | Arg144Cys | SNP_A-2307767 | 1.00 | 1 | N |      |                 |       | N |      |                  |      |
| CYP2C9  |           | rs2860975     |      | 2 | Y | 0.42 | 0.92[0.84,1.01] | 0.20  | Y | 0.39 | 1.05 [0.93,1.19] | 0.42 |
| ENPP1   | Lys121Gln | rs9375831     | 1.00 | 2 | Y | 0.24 | 0.92[0.83,1.03] | 0.06  | Y | 0.24 | 1.02 [0.89,1.17] | 0.74 |
| ENPP1   |           | rs7767502     | 1.00 | 2 | Y | 0.14 | 1.01[0.89,1.15] | 0.53  | N |      |                  |      |
| ESR1    | -397T/C   |               |      | 3 |   |      |                 |       |   |      |                  |      |
| ESR1    | -351A/G   |               |      | 3 |   |      |                 |       |   |      |                  |      |
| F12     | Arg353Gln |               |      | 3 |   |      |                 |       |   |      |                  |      |
| F13A1   | Val34Leu  | rs3024339     | 1.00 | 2 | Y | 0.07 | 0.98[0.82,1.18] | 0.51  | Y | 0.06 | 1.00 [0.76,1.30] | 0.98 |
| F13A1   |           | rs3024317     | 1.00 | 2 | Y | 0.39 | 1.03[0.94,1.13] | 0.56  | Y | 0.37 | 1.04 [0.91,1.18] | 0.55 |
| F13A1   |           | rs1781790     | 1.00 | 2 | N |      |                 |       | N |      |                  |      |
| F13A1   |           | rs1674045     | 1.00 | 2 | Y | 0.28 | 1.04[0.94,1.15] | 0.53  | Y | 0.28 | 0.95 [0.82,1.09] | 0.42 |
| F13A1   |           | rs1674043     | 1.00 | 2 | Y | 0.28 | 1.04[0.94,1.15] | 0.53  | Y | 0.28 | 0.97 [0.84,1.12] | 0.67 |



|              |                  |                  |             |          |   |      |                 |      |          |             |             |                    |             |
|--------------|------------------|------------------|-------------|----------|---|------|-----------------|------|----------|-------------|-------------|--------------------|-------------|
| <b>F13A1</b> |                  | rs2755413        | 1.00        | 2        | Y | 0.28 | 1.05[0.95,1.16] | 0.31 | N        |             |             |                    |             |
| <b>F13A1</b> |                  | rs7758057        | 1.00        | 2        | Y | 0.34 | 0.96[0.87,1.05] | 0.78 | N        |             |             |                    |             |
| <b>F13A1</b> |                  | rs1267913        | 1.00        | 2        | Y | 0.22 | 0.96[0.86,1.07] | 0.64 | Y        | 0.23        | 0.95        | [0.81,1.10]        | 0.48        |
| <b>F2</b>    | 20210G/A         |                  |             | 3        |   |      |                 |      |          |             |             |                    |             |
| <b>F3</b>    | -603A/G          |                  |             | 3        |   |      |                 |      |          |             |             |                    |             |
| <b>F5</b>    | 1691G/A          |                  |             | 3        |   |      |                 |      |          |             |             |                    |             |
| <b>F7</b>    | <b>Arg353Gln</b> | <b>rs1755685</b> | <b>0.85</b> | <b>2</b> | Y | 0.11 | 1.03[0.89,1.18] | 0.89 | <b>Y</b> | <b>0.13</b> | <b>0.82</b> | <b>[0.69,0.99]</b> | <b>0.03</b> |
| <b>F7</b>    | -402G/A          |                  |             | 3        |   |      |                 |      |          |             |             |                    |             |
| <b>F7</b>    | -32310-bpdel-ins |                  |             | 3        |   |      |                 |      |          |             |             |                    |             |
| <b>F7</b>    | -670A/C          |                  |             | 3        |   |      |                 |      |          |             |             |                    |             |
| <b>FGB</b>   | -463A/G          | rs2059503        | 0.86        | 2        | Y | 0.17 | 1.07[0.94,1.20] | 0.55 | N        |             |             |                    |             |
| <b>FGB</b>   |                  | rs2227426        | 0.86        | 2        | Y | 0.17 | 1.06[0.94,1.19] | 0.66 | N        |             |             |                    |             |
| <b>FGB</b>   |                  | <b>rs2227424</b> | <b>0.86</b> | <b>2</b> | Y | 0.17 | 1.09[0.96,1.22] | 0.38 | <b>Y</b> | <b>0.21</b> | <b>0.83</b> | <b>[0.71,0.97]</b> | <b>0.01</b> |
| <b>FGB</b>   |                  | <b>rs4681</b>    | <b>0.86</b> | <b>2</b> | Y | 0.17 | 1.07[0.95,1.21] | 0.47 | <b>Y</b> | <b>0.21</b> | <b>0.83</b> | <b>[0.72,0.96]</b> | <b>0.01</b> |
| <b>GCK</b>   | -30G/A           | SNP_A-4276984    |             | 1        | Y | 0.18 | 0.98[0.87,1.11] | 0.79 | Y        | 0.19        | 0.98        | [0.83,1.15]        | 0.79        |
| <b>GCK</b>   | -89C/T           | rs2908282        | 1.00        | 2        | Y | 0.18 | 0.98[0.87,1.1]  | 0.79 | Y        | 0.19        | 0.94        | [0.80,1.09]        | 0.4         |
| <b>GCLM</b>  | -23A/C           |                  |             | 3        |   |      |                 |      |          |             |             |                    |             |
| <b>GJA4</b>  | Pro319Ser        |                  |             | 3        |   |      |                 |      |          |             |             |                    |             |
| <b>GJA4</b>  | C1019T           |                  |             | 3        |   |      |                 |      |          |             |             |                    |             |
| <b>GNB3</b>  | +4423C/T         |                  |             | 3        |   |      |                 |      |          |             |             |                    |             |
| <b>GP1BA</b> | -5C/T            | rs2243100        |             | 2        | Y | 0.12 | 1.00[0.87,1.15] | 0.77 | N        |             |             |                    |             |
| <b>GP1BA</b> |                  | rs2243102        | 1.00        | 2        | Y | 0.41 | 1.00[0.91,1.1]  | 1.00 | Y        | 0.43        | 1.06        | [0.94,1.19]        | 0.33        |
| <b>GP6</b>   | Ser219Pro        | rs12981732       | 1.00        | 2        | Y | 0.22 | 1.02[0.91,1.13] | 0.85 | Y        | 0.21        | 1.07        | [0.92,1.24]        | 0.36        |
| <b>GP6</b>   |                  | rs1654416        | 0.84        | 2        | Y | 0.18 | 1.02[0.91,1.15] | 0.25 | Y        | 0.18        | 0.92        | [0.78,1.09]        | 0.32        |
| <b>GP6</b>   |                  | rs11671922       | 0.84        | 2        | Y | 0.19 | 1.01[0.90,1.13] | 0.30 | N        |             |             |                    |             |
| <b>GP6</b>   |                  | rs11084382       | 0.72        | 2        | Y | 0.22 | 0.98[0.88,1.09] | 0.62 | Y        | 0.22        | 0.97        | [0.84,1.13]        | 0.73        |
| <b>GP6</b>   |                  | rs11668169       | 0.84        | 2        | Y | 0.19 | 1.01[0.90,1.13] | 0.31 | N        |             |             |                    |             |
| <b>GP6</b>   |                  | rs11672026       | 0.84        | 2        | Y | 0.19 | 1.01[0.90,1.13] | 0.29 | Y        | 0.19        | 0.93        | [0.79,1.10]        | 0.4         |
| <b>GP6</b>   |                  | rs1654419        | 0.84        | 2        | Y | 0.19 | 1.01[0.90,1.13] | 0.31 | Y        | 0.18        | 0.89        | [0.76,1.04]        | 0.12        |
| <b>GP6</b>   |                  | rs1654420        | 0.84        | 2        | Y | 0.19 | 1.00[0.9,1.12]  | 0.31 | Y        | 0.18        | 0.88        | [0.75,1.03]        | 0.1         |
| <b>GP6</b>   |                  | rs1654421        | 0.84        | 2        | Y | 0.19 | 1.01[0.90,1.13] | 0.43 | Y        | 0.18        | 0.88        | [0.75,1.03]        | 0.1         |
| <b>GP6</b>   |                  | rs17836542       | 1.00        | 2        | Y | 0.05 | 1.10[0.89,1.36] | 0.42 | N        |             |             |                    |             |
| <b>GP6</b>   |                  | rs2569513        | 0.89        | 2        | Y | 0.17 | 1.02[0.91,1.15] | 0.23 | N        |             |             |                    |             |
| <b>GP6</b>   |                  | rs1671214        | 1.00        | 2        | Y | 0.31 | 0.99[0.90,1.10] | 0.87 | Y        | 0.33        | 1.01        | [0.89,1.15]        | 0.86        |
| <b>GP6</b>   |                  | rs1654439        | 0.86        | 2        | Y | 0.17 | 1.05[0.93,1.19] | 0.18 | N        |             |             |                    |             |

|       |           |               |      |   |   |      |                 |      |   |      |      |             |      |
|-------|-----------|---------------|------|---|---|------|-----------------|------|---|------|------|-------------|------|
| GP6   |           | rs8113032     | 1.00 | 2 | Y | 0.41 | 1.07[0.97,1.17] | 0.23 | N |      |      |             |      |
| HMOX1 | -496A/T   | rs9306300     | 1.00 | 2 | Y | 0.05 | 1.04[0.85,1.27] | 0.88 | N |      |      |             |      |
| HMOX1 |           | rs2071749     | 0.82 | 2 | Y | 0.48 | 0.99[0.90,1.08] | 0.88 | Y | 0.46 | 0.96 | [0.85,1.09] | 0.52 |
| HTR2A | 102C/T    | SNP_A-2053884 |      | 1 | N |      |                 |      | N |      |      |             |      |
| HTR2A |           | rs1360020     | 1.00 | 2 | Y | 0.47 | 1.03[0.94,1.13] | 0.29 | N |      |      |             |      |
| HTR2A |           | rs1928040     | 0.84 | 2 | N |      |                 |      | N |      |      |             |      |
| HTR2A |           | rs4941573     | 1.00 | 2 | Y | 0.41 | 0.99[0.90,1.08] | 0.85 | Y | 0.42 | 0.93 | [0.82,1.06] | 0.25 |
| ICAM1 | Glu469Lys | rs2569702     | 0.90 | 2 | Y | 0.38 | 1.03[0.94,1.13] | 0.75 | Y | 0.39 | 1.19 | [1.05,1.35] | 0.01 |
| IL1B  | -511G/T   |               |      | 3 |   |      |                 |      |   |      |      |             |      |
| IL6   | 174G/C    |               |      | 3 |   |      |                 |      |   |      |      |             |      |
| IL6   | -596A/G   | rs1800795     | 0.93 | 2 | Y | 0.42 | 1.00[0.91,1.09] | 0.62 | N |      |      |             |      |
| ITGA2 | Phe253Phe | rs1421933     | 1.00 | 2 | Y | 0.27 | 0.96[0.87,1.06] | 0.49 | Y | 0.28 | 0.99 | [0.86,1.14] | 0.85 |
| ITGA2 |           | rs3212486     | 1.00 | 2 | Y | 0.29 | 1.04[0.95,1.15] | 0.24 | N |      |      |             |      |
| ITGA2 |           | rs1421937     | 1.00 | 2 | Y | 0.29 | 1.04[0.95,1.15] | 0.25 | N |      |      |             |      |
| ITGA2 |           | rs3212439     | 1.00 | 2 | Y | 0.29 | 1.04[0.95,1.15] | 0.25 | Y | 0.28 | 1.03 | [0.90,1.18] | 0.67 |
| ITGA2 |           | rs989073      | 1.00 | 2 | Y | 0.32 | 1.06[0.96,1.17] | 0.11 | Y | 0.32 | 1.03 | [0.91,1.17] | 0.64 |
| ITGA2 |           | rs7735277     | 1.00 | 2 | Y | 0.23 | 0.96[0.86,1.07] | 0.52 | N |      |      |             |      |
| ITGA2 |           | rs3212527     | 1.00 | 2 | Y | 0.49 | 1.01[0.92,1.11] | 0.78 | Y | 0.49 | 0.94 | [0.83,1.07] | 0.36 |
| ITGA2 |           | rs12515434    | 1.00 | 2 | Y | 0.09 | 1.02[0.87,1.19] | 0.34 | N |      |      |             |      |
| ITGA2 |           | rs12521915    | 1.00 | 2 | Y | 0.37 | 1.03[0.94,1.13] | 0.28 | Y | 0.38 | 0.97 | [0.85,1.09] | 0.57 |
| ITGA2 | G873A     | rs1421933     | 1.00 | 2 | Y | 0.27 | 0.96[0.87,1.06] | 0.49 | Y | 0.28 | 0.99 | [0.86,1.14] | 0.85 |
| ITGA2 |           | rs3212486     | 1.00 | 2 | Y | 0.29 | 1.04[0.95,1.15] | 0.24 | N |      |      |             |      |
| ITGA2 |           | rs1421937     | 1.00 | 2 | Y | 0.29 | 1.04[0.95,1.15] | 0.25 | N |      |      |             |      |
| ITGA2 |           | rs3212439     | 1.00 | 2 | Y | 0.29 | 1.04[0.95,1.15] | 0.25 | Y | 0.28 | 1.03 | [0.90,1.18] | 0.67 |
| ITGA2 |           | rs989073      | 1.00 | 2 | Y | 0.32 | 1.06[0.96,1.17] | 0.11 | Y | 0.32 | 1.03 | [0.91,1.17] | 0.64 |
| ITGA2 |           | rs7735277     | 1.00 | 2 | Y | 0.23 | 0.96[0.86,1.07] | 0.52 | N |      |      |             |      |
| ITGA2 |           | rs3212527     | 1.00 | 2 | Y | 0.49 | 1.01[0.92,1.11] | 0.78 | Y | 0.49 | 0.94 | [0.83,1.07] | 0.36 |
| ITGA2 |           | rs12515434    | 1.00 | 2 | Y | 0.09 | 1.02[0.87,1.19] | 0.34 | N |      |      |             |      |
| ITGA2 |           | rs12521915    | 0.83 | 2 | Y | 0.37 | 1.03[0.94,1.13] | 0.28 | Y | 0.38 | 0.97 | [0.85,1.09] | 0.57 |
| ITGB2 | Leu10Leu  |               |      | 3 |   |      |                 |      |   |      |      |             |      |
| ITGB3 | Leu59Pro  | rs8069732     | 1.00 | 2 | Y | 0.15 | 0.97[0.85,1.09] | 0.67 | Y | 0.15 | 1.04 | [0.88,1.24] | 0.62 |
| ITGB3 |           | rs8077375     | 0.93 | 2 | Y | 0.15 | 0.91[0.80,1.04] | 0.25 | Y | 0.15 | 1.06 | [0.90,1.24] | 0.5  |
| ITGB3 |           | rs11657517    | 1.00 | 2 | Y | 0.24 | 0.97[0.88,1.08] | 0.68 | Y | 0.25 | 1.09 | [0.94,1.27] | 0.22 |
| ITGB3 |           | rs4525555     | 1.00 | 2 | Y | 0.30 | 0.98[0.89,1.08] | 0.93 | Y | 0.32 | 1.05 | [0.92,1.19] | 0.46 |
| ITGB3 |           | rs8080254     | 1.00 | 2 | Y | 0.27 | 0.96[0.87,1.06] | 0.78 | Y | 0.28 | 1.09 | [0.96,1.25] | 0.19 |



|              |           |               |      |   |   |      |                 |      |   |      |                  |      |
|--------------|-----------|---------------|------|---|---|------|-----------------|------|---|------|------------------|------|
| <b>MMP3</b>  | Lys45Glu  | rs655403      | 1.00 | 2 | Y | 0.12 | 1.17[1.01,1.34] | 0.11 | N |      |                  |      |
| <b>MMP3</b>  |           | rs650108      | 1.00 | 2 | N |      |                 |      | N |      |                  |      |
| <b>MMP9</b>  | -1562C/T  |               |      | 3 |   |      |                 |      |   |      |                  |      |
| <b>MMP9</b>  | Arg279Gln |               |      | 3 |   |      |                 |      |   |      |                  |      |
| <b>MMP9</b>  | 7476C/T   |               |      | 3 |   |      |                 |      |   |      |                  |      |
| <b>MTCO2</b> | -738C/G   |               |      | 3 |   |      |                 |      |   |      |                  |      |
| <b>MTHFR</b> | Ala222Val | rs9651118     | 1.00 | 2 | Y | 0.22 | 0.97[0.87,1.08] | 0.91 | N |      |                  |      |
| <b>MTHFR</b> |           | rs17367504    | 1.00 | 2 | Y | 0.16 | 0.93[0.82,1.05] | 0.18 | N |      |                  |      |
| <b>MTHFR</b> |           | rs4845882     | 1.00 | 2 | Y | 0.39 | 0.97[0.88,1.06] | 0.68 | Y | 0.39 | 0.98 [0.86,1.10] | 0.7  |
| <b>MTR</b>   |           | SNP_A-1989628 |      | 1 | N |      |                 |      | Y | 0.18 | 0.99 [0.88,1.12] | 0.88 |
| <b>MTR</b>   | Asp919Gly | rs10733117    | 1.00 | 2 | Y | 0.40 | 0.98[0.90,1.08] | 0.68 | Y | 0.41 | 0.99 [0.88,1.12] | 0.88 |
| <b>MTR</b>   |           | rs10733118    | 1.00 | 2 | Y | 0.38 | 0.98[0.89,1.07] | 0.69 | Y | 0.38 | 1.01 [0.90,1.14] | 0.83 |
| <b>MTR</b>   |           | rs2185208     | 1.00 | 2 | Y | 0.37 | 0.97[0.88,1.07] | 0.54 | N |      |                  |      |
| <b>MTR</b>   |           | rs2385504     | 0.88 | 2 | Y | 0.17 | 0.94[0.83,1.06] | 0.33 | Y | 0.16 | 0.99 [0.84,1.18] | 0.95 |
| <b>MTR</b>   |           | rs2385509     | 1.00 | 2 | Y | 0.42 | 1.07[0.98,1.17] | 0.11 | Y | 0.42 | 1.03 [0.90,1.16] | 0.7  |
| <b>MTR</b>   |           | rs2385500     | 1.00 | 2 | Y | 0.42 | 1.06[0.97,1.16] | 0.15 | Y | 0.42 | 1.00 [0.88,1.13] | 0.96 |
| <b>MTR</b>   |           | rs17599657    | 1.00 | 2 | Y | 0.18 | 0.91[0.81,1.02] | 0.14 | Y | 0.17 | 0.96 [0.81,1.14] | 0.66 |
| <b>MTR</b>   |           | rs3768139     | 1.00 | 2 | Y | 0.37 | 0.96[0.88,1.06] | 0.48 | Y | 0.37 | 1.01 [0.90,1.14] | 0.86 |
| <b>MTR</b>   |           | rs4659736     | 1.00 | 2 | Y | 0.18 | 0.90[0.80,1.02] | 0.12 | N |      |                  |      |
| <b>MTR</b>   |           | rs4659738     | 1.00 | 2 | Y | 0.37 | 0.97[0.88,1.06] | 0.50 | Y | 0.37 | 0.99 [0.87,1.12] | 0.82 |
| <b>MTR</b>   |           | rs4659739     | 1.00 | 2 | Y | 0.37 | 0.95[0.87,1.05] | 0.35 | Y | 0.38 | 0.97 [0.85,1.10] | 0.63 |
| <b>MTR</b>   |           | rs2275565     | 0.89 | 2 | Y | 0.21 | 0.96[0.86,1.07] | 0.48 | Y | 0.21 | 1.00 [0.86,1.17] | 0.99 |
| <b>MTR</b>   |           | rs10158822    | 1.00 | 2 | Y | 0.19 | 0.92[0.82,1.03] | 0.19 | N |      |                  |      |
| <b>MTR</b>   |           | rs1266164     | 1.00 | 2 | Y | 0.37 | 0.97[0.88,1.06] | 0.49 | N |      |                  |      |
| <b>MTR</b>   |           | rs16834516    | 1.00 |   | N |      |                 |      | N |      |                  |      |
| <b>MTR</b>   |           | rs2282369     | 1.00 | 2 | Y | 0.38 | 0.99[0.90,1.09] | 0.92 | Y | 0.40 | 0.99 [0.88,1.12] | 0.88 |
| <b>MTR</b>   |           | rs1252252     | 1.00 | 2 | Y | 0.37 | 0.97[0.88,1.06] | 0.36 | N |      |                  |      |
| <b>MTR</b>   |           | rs10737812    | 1.00 | 2 | Y | 0.42 | 1.02[0.93,1.12] | 0.81 | Y | 0.43 | 0.98 [0.87,1.11] | 0.77 |
| <b>MTR</b>   |           | rs4659743     | 1.00 | 2 | Y | 0.38 | 0.97[0.88,1.06] | 0.44 | Y | 0.38 | 1.00 [0.89,1.13] | 0.98 |
| <b>MTR</b>   |           | rs2853523     | 1.00 | 2 | Y | 0.37 | 0.97[0.88,1.06] | 0.51 | N |      |                  |      |
| <b>MTR</b>   |           | rs10925273    | 0.88 | 2 | Y | 0.17 | 0.90[0.80,1.01] | 0.19 | Y | 0.17 | 1.06 [0.89,1.25] | 0.5  |
| <b>MTR</b>   |           | rs1252101     | 1.00 | 2 | Y | 0.33 | 0.94[0.85,1.03] | 0.24 | Y | 0.33 | 0.94 [0.83,1.06] | 0.3  |
| <b>MTR</b>   |           | rs7553232     | 1.00 | 2 | Y | 0.06 | 0.97[0.80,1.18] | 0.76 | N |      |                  |      |
| <b>MTR</b>   |           | rs1270972     | 1.00 | 2 | Y | 0.26 | 1.05[0.95,1.16] | 0.35 | Y | 0.28 | 1.09 [0.96,1.25] | 0.18 |
| <b>MTR</b>   |           | rs10925261    | 1.00 | 2 | Y | 0.19 | 0.92[0.82,1.03] | 0.19 | N |      |                  |      |

|        |            |               |      |      |   |      |                 |                 |      |      |                  |                  |      |
|--------|------------|---------------|------|------|---|------|-----------------|-----------------|------|------|------------------|------------------|------|
| MTTP   | -493G/T    |               |      | 3    |   |      |                 |                 |      |      |                  |                  |      |
| NOS3   | Glu298Asp  | rs3918188     | 0.90 | 2    | Y | 0.36 | 0.97[0.89,1.07] | 0.95            | Y    | 0.36 | 0.94 [0.82,1.06] | 0.3              |      |
| NOS3   | -786T/C    |               |      | 3    |   |      |                 |                 |      |      |                  |                  |      |
| NPPA   | T2238C     | SNP_A-4245831 |      | 1    | N |      |                 |                 | Y    | 0.14 | 0.89 [0.74,1.07] | 0.21             |      |
| NR3C1  | Asn362Ser  |               |      | 3    |   |      |                 |                 |      |      |                  |                  |      |
| OLR1   | Lys167Asn  | rs4495966     | 1.00 | 2    | Y | 0.49 | 1.10[1.01,1.21] | 0.04            | Y    | 0.48 | 1.01 [0.89,1.14] | 0.88             |      |
| OLR1   |            | rs2742115     | 1.00 | 2    | Y | 0.26 | 0.96[0.87,1.07] | 0.94            | Y    | 0.25 | 0.95 [0.83,1.09] | 0.49             |      |
| OLR1   |            | rs7300650     | 1.00 | 2    | Y | 0.41 | 0.93[0.85,1.02] | 0.45            | N    |      |                  |                  |      |
| PCSK9  | Arg45Lys   |               |      | 3    |   |      |                 |                 |      |      |                  |                  |      |
| PECAM1 |            | SNP_A-1856272 |      | 1    | N |      |                 |                 | N    |      |                  |                  |      |
| PECAM1 |            | SNP_A-1834715 |      | 1    | N |      |                 |                 | N    |      |                  |                  |      |
| PECAM1 | Val1125Leu | rs11653087    | 0.82 | 2    | Y | 0.49 | 1.02[0.93,1.11] | 0.64            | Y    | 0.50 | 1.13 [1.00,1.28] | 0.04             |      |
| PECAM1 |            | rs6416939     | 0.97 | 2    | Y | 0.48 | 1.00[0.91,1.09] | 1.00            | Y    | 0.48 | 0.88 [0.78,1.00] | 0.04             |      |
| PECAM1 |            | rs12944077    | 0.84 | 2    | Y | 0.50 | 1.01[0.92,1.10] | 0.77            | Y    | 0.50 | 0.89 [0.79,0.99] | 0.04             |      |
| PECAM1 | Ser563Asn  | rs12944077    | 1.00 | 2    | Y | 0.50 | 1.01[0.92,1.10] | 0.77            | Y    | 0.50 | 0.89 [0.79,0.99] | 0.04             |      |
| PECAM1 | Arg55Gly   | rs6416939     | 0.87 | 2    | Y | 0.48 | 1.00[0.91,1.09] | 1.00            | Y    | 0.48 | 0.88 [0.78,1.00] | 0.04             |      |
| PECAM1 |            | rs6416939     | 0.87 | 2    | Y | 0.48 | 1.00[0.91,1.09] | 1.00            | Y    | 0.48 | 0.88 [0.78,1.00] | 0.04             |      |
| PECAM1 |            | rs12944077    | 1.00 | 2    | Y | 0.50 | 1.01[0.92,1.10] | 0.77            | Y    | 0.50 | 0.89 [0.79,0.99] | 0.04             |      |
| PECAM1 | Ser7Ser    |               |      | 3    |   |      |                 |                 |      |      |                  |                  |      |
| PLA2G7 | Leu65Val   | rs12528857    | 1.00 | 2    | Y | 0.22 | 1.00[0.90,1.12] | 0.33            | N    |      |                  |                  |      |
| PLA2G7 |            | rs1421372     | 1.00 | 2    | N |      |                 |                 | N    |      |                  |                  |      |
| PLA2G7 |            | rs1421378     | 1.00 | 2    | Y | 0.38 | 0.99[0.90,1.09] | 0.70            | Y    | 0.37 | 0.94 [0.83,1.07] | 0.35             |      |
| PON1   | Gln192Arg  | rs17773605    | 1.00 | 2    | Y | 0.06 | 1.12[0.92,1.35] | 0.66            | Y    | 0.05 | 0.84 [0.64,1.09] | 0.18             |      |
| PON1   |            | rs3917551     | 0.10 | 1.00 | 2 | Y    | 0.06            | 0.94[0.77,1.14] | 0.67 | Y    | 0.05             | 1.35 [1.03,1.77] | 0.02 |
| PON1   |            | rs3917550     | 1.00 | 2    | Y | 0.13 | 0.99[0.86,1.13] | 0.83            | Y    | 0.13 | 1.10 [0.93,1.31] | 0.25             |      |
| PON1   |            | rs3917541     | 1.00 | 2    | N |      |                 |                 | N    |      |                  |                  |      |
| PON1   |            | rs3917538     | 0.80 | 2    | Y | 0.23 | 0.98[0.88,1.09] | 0.43            | Y    | 0.23 | 0.99 [0.86,1.14] | 0.93             |      |
| PON1   |            | rs2158155     | 1.00 | 2    | Y | 0.06 | 0.93[0.77,1.14] | 0.59            | N    |      |                  |                  |      |
| PON1   |            | rs2057681     | 1.00 | 2    | Y | 0.29 | 0.97[0.88,1.07] | 0.37            | Y    | 0.28 | 1.06 [0.93,1.21] | 0.36             |      |
| PON1   |            | rs3917527     | 1.00 | 2    | Y | 0.06 | 0.95[0.79,1.16] | 0.73            | N    |      |                  |                  |      |
| PON1   |            | rs2299257     | 1.00 | 2    | Y | 0.39 | 0.98[0.90,1.08] | 0.39            | N    |      |                  |                  |      |
| PON1   | Leu55Met   | rs3917550     | 1.00 | 2    | Y | 0.13 | 0.99[0.86,1.13] | 0.83            | Y    | 0.13 | 1.10 [0.93,1.31] | 0.25             |      |
| PON1   |            | rs2272365     | 1.00 | 2    | Y | 0.15 | 1.03[0.91,1.17] | 0.90            | N    |      |                  |                  |      |
| PON1   | C907G      | SNP_A-2012725 |      | 1    | N |      |                 |                 | Y    | 0.51 | 1.20 [1.07,1.35] | 0.002            |      |
| PON1   |            | rs705382      | 1.00 | 2    | Y | 0.38 | 1.01[0.92,1.11] | 0.96            | N    |      |                  |                  |      |

|       |           |                  |             |          |          |             |                        |             |   |      |                  |      |
|-------|-----------|------------------|-------------|----------|----------|-------------|------------------------|-------------|---|------|------------------|------|
| PON2  |           | SNP_A-2179271    |             | 1        | N        |             |                        |             | Y | 0.23 | 1.08 [0.94,1.24] | 0.29 |
| PON2  |           | rs11764079       | 0.87        | 2        | Y        | 0.27        | 0.98[0.89,1.09]        | 0.86        | Y | 0.25 | 1.01 [0.87,1.16] | 0.91 |
| PON2  |           | rs2299263        | 1.00        | 2        | Y        | 0.24        | 0.94[0.84,1.04]        | 0.52        | Y | 0.23 | 1.08 [0.94,1.24] | 0.27 |
| PON2  |           | rs1639           | 1.00        | 2        | Y        | 0.21        | 1.05[0.94,1.17]        | 0.40        | N |      |                  |      |
| PON2  |           | rs7785039        | 1.00        | 2        | Y        | 0.21        | 0.98[0.88,1.10]        | 0.61        | N |      |                  |      |
| PON2  |           | rs7778623        | 1.00        | 2        | Y        | 0.34        | 0.98[0.89,1.08]        | 0.95        | Y | 0.33 | 1.09 [0.96,1.24] | 0.18 |
| PON2  |           | rs3757707        | 1.00        | 2        | Y        | 0.31        | 1.00[0.90,1.10]        | 0.53        | Y | 0.27 | 1.09 [0.95,1.25] | 0.22 |
| PPARA | Leu162Val | rs4253754        | 1.00        | 2        | Y        | 0.21        | 0.95[0.85,1.06]        | 0.89        | Y | 0.20 | 1.04 [0.90,1.21] | 0.6  |
| PPARG | His476His | rs17036188       | 1.00        | 2        | Y        | 0.03        | 0.94[0.71,1.24]        | 0.28        | N |      |                  |      |
| PPARG |           | rs4135283        | 1.00        | 2        | Y        | 0.03        | 0.90[0.69,1.17]        | 0.13        | N |      |                  |      |
| PPARG |           | rs4684859        | 1.00        | 2        | Y        | 0.43        | 0.98[0.90,1.08]        | 0.88        | Y | 0.43 | 1.06 [0.94,1.21] | 0.31 |
| PPARG | Pro12Ala  | SNP_A-1971790    | 1.00        | 1        | N        |             |                        |             | Y | 0.14 | 0.93 [0.78,1.10] | 0.39 |
| PPARG |           | rs11709077       | 1.00        | 2        | Y        | 0.12        | 0.94[0.82,1.08]        | 0.43        | Y | 0.14 | 0.93 [0.78,1.11] | 0.44 |
| PPARG |           | rs17036328       | 1.00        | 2        | Y        | 0.12        | 0.94[0.82,1.08]        | 0.45        | Y | 0.14 | 0.92 [0.77,1.11] | 0.38 |
| SELE  | Ser128Arg | rs3917410        | 1.00        | 2        | Y        | 0.10        | 0.88[0.76,1.02]        | 0.07        | Y | 0.11 | 0.98 [0.81,1.18] | 0.8  |
| SELE  |           | <b>rs3917392</b> | <b>1.00</b> | <b>2</b> | <b>Y</b> | <b>0.10</b> | <b>0.86[0.74,1.00]</b> | <b>0.04</b> | Y | 0.11 | 1.04 [0.86,1.25] | 0.67 |
| SELE  |           | rs3917411        | 1.00        | 2        | Y        | 0.10        | 0.88[0.76,1.02]        | 0.09        | Y | 0.11 | 1.04 [0.86,1.25] | 0.68 |
| SELE  |           | rs1534904        | 1.00        | 2        | Y        | 0.34        | 0.90[0.82,0.99]        | 0.14        | Y | 0.31 | 0.92 [0.81,1.05] | 0.2  |
| SELE  |           | <b>rs3917425</b> | <b>1.00</b> | <b>2</b> | <b>Y</b> | <b>0.10</b> | <b>0.87[0.75,1.01]</b> | <b>0.05</b> | Y | 0.11 | 1.04 [0.86,1.26] | 0.67 |
| SELE  |           | rs12133642       | 1.00        | 2        | Y        | 0.10        | 0.87[0.75,1.01]        | 0.06        | Y | 0.11 | 1.05 [0.87,1.26] | 0.62 |
| SELE  |           | rs4656701        | 1.00        | 2        | Y        | 0.25        | 1.08[0.97,1.20]        | 0.26        | Y | 0.26 | 1.02 [0.89,1.18] | 0.73 |
| SELE  | G98T      | rs3917410        | 1.00        | 2        | Y        | 0.10        | 0.88[0.76,1.02]        | 0.07        | Y | 0.11 | 0.98 [0.81,1.18] | 0.8  |
| SELE  |           | <b>rs3917392</b> | <b>1.00</b> | <b>2</b> | <b>Y</b> | <b>0.10</b> | <b>0.86[0.74,1.00]</b> | <b>0.04</b> | Y | 0.11 | 1.04 [0.86,1.25] | 0.67 |
| SELE  |           | rs3917411        | 1.00        | 2        | Y        | 0.10        | 0.88[0.76,1.02]        | 0.09        | Y | 0.11 | 1.04 [0.86,1.25] | 0.68 |
| SELE  |           | rs1534904        | 1.00        | 2        | Y        | 0.34        | 0.90[0.82,0.99]        | 0.14        | Y | 0.31 | 0.92 [0.81,1.05] | 0.2  |
| SELE  |           | <b>rs3917425</b> | <b>1.00</b> | <b>2</b> | <b>Y</b> | <b>0.10</b> | <b>0.87[0.75,1.01]</b> | <b>0.05</b> | Y | 0.11 | 1.04 [0.86,1.26] | 0.67 |
| SELE  |           | rs12133642       | 1.00        | 2        | Y        | 0.10        | 0.87[0.75,1.01]        | 0.06        | Y | 0.11 | 1.05 [0.87,1.26] | 0.62 |
| SELE  |           | rs4656701        | 1.00        | 2        | Y        | 0.25        | 1.08[0.97,1.20]        | 0.26        | Y | 0.26 | 1.02 [0.89,1.18] | 0.73 |
| SELP  | Thr719Pro | rs3753305        | 1.00        | 2        | Y        | 0.45        | 0.97[0.89,1.06]        | 0.65        | Y | 0.45 | 1.02 [0.90,1.15] | 0.76 |
| SELP  |           | rs10489185       | 1.00        | 2        | Y        | 0.40        | 0.99[0.90,1.08]        | 0.36        | N |      |                  |      |
| SELP  |           | rs6662176        | 1.00        | 2        | Y        | 0.31        | 1.01[0.92,1.11]        | 0.94        | Y | 0.30 | 0.98 [0.86,1.12] | 0.76 |
| SELP  |           | rs2213873        | 1.00        | 2        | Y        | 0.32        | 0.99[0.90,1.09]        | 0.77        | N |      |                  |      |
| SELP  |           | rs12406092       | 1.00        | 2        | Y        | 0.31        | 1.00[0.91,1.10]        | 0.92        | N |      |                  |      |
| SELP  |           | rs6691048        | 1.00        | 2        | Y        | 0.32        | 0.99[0.90,1.09]        | 0.82        | N |      |                  |      |
| SELP  |           | <b>rs6663533</b> | <b>1.00</b> | <b>2</b> | <b>Y</b> | <b>0.06</b> | <b>1.23[1.01,1.48]</b> | <b>0.02</b> | Y | 0.05 | 1.09 [0.84,1.41] | 0.5  |

|           |                  |                  |             |          |          |             |                        |             |   |      |                  |      |
|-----------|------------------|------------------|-------------|----------|----------|-------------|------------------------|-------------|---|------|------------------|------|
| SELP      |                  | rs9332542        | 1.00        | 2        | Y        | 0.31        | 1.00[0.91,1.10]        | 0.88        | Y | 0.30 | 0.97 [0.86,1.11] | 0.69 |
| SELP      |                  | rs2298905        | 1.00        | 2        | Y        | 0.32        | 1.00[0.91,1.10]        | 0.91        | N |      |                  |      |
| SELP      |                  | rs3917786        | 1.00        | 2        | Y        | 0.44        | 0.98[0.89,1.07]        | 0.60        | Y | 0.44 | 1.01 [0.89,1.14] | 0.91 |
| SELP      |                  | rs2420378        | 1.00        | 2        | Y        | 0.35        | 1.02[0.93,1.12]        | 0.96        | Y | 0.37 | 0.95 [0.84,1.08] | 0.45 |
| SELP      |                  | rs2205895        | 1.00        | 2        | Y        | 0.36        | 1.02[0.93,1.12]        | 0.93        | Y | 0.37 | 1.00 [0.89,1.13] | 0.99 |
| SELP      |                  | rs3917768        | 1.00        | 2        | Y        | 0.44        | 0.99[0.91,1.09]        | 0.32        | Y | 0.45 | 1.00 [0.88,1.12] | 0.94 |
| SELP      | -1696A/G         | rs3917731        | 1.00        | 2        | Y        | 0.29        | 0.99[0.89,1.09]        | 0.75        | Y | 0.28 | 1.05 [0.91,1.20] | 0.5  |
| SELPLG    | Ser236Pro        |                  |             | 3        |          |             |                        |             |   |      |                  |      |
| SELPLG    | Val264Met        |                  |             | 3        |          |             |                        |             |   |      |                  |      |
| TFPI      |                  |                  |             | 3        |          |             |                        |             |   |      |                  |      |
| TGFB1     | Arg25Pro         |                  |             | 3        |          |             |                        |             |   |      |                  |      |
| TGFB1     | Ala1969Gly       |                  |             | 3        |          |             |                        |             |   |      |                  |      |
| THBD      | Pro246Ser        |                  |             | 3        |          |             |                        |             |   |      |                  |      |
| THBD      | Val264Met        |                  |             | 3        |          |             |                        |             |   |      |                  |      |
| THBS1     | Val292Met        | rs2618162        | 1.00        | 2        | Y        | 0.30        | 1.04[0.95,1.15]        | 0.44        | Y | 0.30 | 1.01 [0.88,1.15] | 0.93 |
| THBS1     |                  | rs1051442        | 1.00        | 2        | Y        | 0.18        | 1.09[0.96,1.22]        | 0.35        | Y | 0.18 | 1.11 [0.94,1.30] | 0.2  |
| THBS4     | Leu10Pro         | SNP_A-1889351    |             | 1        | Y        | 0.21        | 1.05[0.86,1.17]        | 0.70        | Y | 0.20 | 1.03 [0.89,1.19] | 0.7  |
| THBS4     |                  | rs4703797        | 1.00        | 2        | Y        | 0.33        | 1.05[0.96,1.16]        | 0.23        | Y | 0.30 | 1.08 [0.94,1.23] | 0.28 |
| THBS4     |                  | rs12332694       | 1.00        | 2        | Y        | 0.33        | 1.04[0.94,1.14]        | 0.34        | Y | 0.30 | 1.00 [0.88,1.14] | 1    |
| TLR4      |                  | <b>rs7864330</b> | <b>1.00</b> | <b>2</b> | <b>Y</b> | <b>0.06</b> | <b>1.13[0.93,1.36]</b> | <b>0.05</b> | N |      |                  |      |
| TLR4      | <b>Ala387Pro</b> | <b>rs7864330</b> | <b>1.00</b> | <b>2</b> | <b>Y</b> | <b>0.06</b> | <b>1.13[0.93,1.36]</b> | <b>0.05</b> | N |      |                  |      |
| TNF       | -308G/A          |                  |             | 3        |          |             |                        |             |   |      |                  |      |
| TNFRSF11B | T950C            | rs10505346       | 1.00        | 2        | Y        | 0.18        | 1.04[0.93,1.17]        | 0.28        | Y | 0.19 | 0.91 [0.78,1.07] | 0.25 |
| TNFRSF11B |                  | rs11573870       | 1.00        | 2        | Y        | 0.02        | 1.28[0.92,1.78]        | 0.30        | N |      |                  |      |
| TNFRSF11B |                  | rs11573871       | 1.00        | 2        | Y        | 0.07        | 0.90[0.76,1.07]        | 0.18        | Y | 0.06 | 1.26 [0.99,1.59] | 0.06 |
| TNFRSF11B |                  | rs11573884       | 1.00        | 2        | Y        | 0.09        | 1.06[0.91,1.24]        | 0.48        | N |      |                  |      |
| TNFRSF11B |                  | rs11573896       | 1.00        | 2        | Y        | 0.16        | 1.06[0.94,1.20]        | 0.29        | Y | 0.15 | 0.93 [0.78,1.10] | 0.39 |
| TNFRSF11B |                  | rs11573897       | 1.00        | 2        | Y        | 0.02        | 1.27[0.92,1.75]        | 0.30        | N |      |                  |      |
| TNFRSF11B |                  | rs3102724        | 1.00        | 2        | Y        | 0.34        | 1.04[0.94,1.14]        | 0.45        | Y | 0.33 | 1.11 [0.98,1.26] | 0.09 |
| TNFRSF11B |                  | rs11573901       | 1.00        | 2        | Y        | 0.04        | 1.05[0.82,1.33]        | 0.58        | Y | 0.04 | 0.82 [0.60,1.10] | 0.17 |
| TNFRSF11B |                  | rs10505348       | 1.00        | 2        | Y        | 0.46        | 0.91[0.83,1.00]        | 0.11        | Y | 0.47 | 1.01 [0.90,1.13] | 0.89 |
| TNFRSF11B |                  | rs10505349       | 1.00        | 2        | Y        | 0.18        | 1.04[0.93,1.17]        | 0.28        | Y | 0.19 | 0.90 [0.77,1.04] | 0.15 |
| TNFRSF11B |                  | rs7014574        | 1.00        | 2        | N        |             |                        |             | N |      |                  |      |
| TNFRSF11B | Lys3Asn          | rs10505346       | 1.00        | 2        | Y        | 0.18        | 1.04[0.93,1.17]        | 0.28        | Y | 0.19 | 0.91 [0.78,1.07] | 0.25 |
| TNFRSF11B |                  | rs11573870       | 1.00        | 2        | Y        | 0.02        | 1.28[0.92,1.78]        | 0.30        | N |      |                  |      |

|           |          |                  |             |          |   |      |                 |      |          |             |                         |             |
|-----------|----------|------------------|-------------|----------|---|------|-----------------|------|----------|-------------|-------------------------|-------------|
| TNFRSF11B |          | rs11573871       | 1.00        | 2        | Y | 0.07 | 0.90[0.76,1.07] | 0.18 | Y        | 0.06        | 1.26 [0.99,1.59]        | 0.06        |
| TNFRSF11B |          | rs11573896       | 1.00        | 2        | Y | 0.16 | 1.06[0.94,1.20] | 0.29 | Y        | 0.15        | 0.93 [0.78,1.10]        | 0.39        |
| TNFRSF11B |          | rs11573897       | 1.00        | 2        | Y | 0.02 | 1.27[0.92,1.75] | 0.30 | N        |             |                         |             |
| TNFRSF11B |          | rs3102724        | 1.00        | 2        | Y | 0.34 | 1.04[0.94,1.14] | 0.45 | Y        | 0.33        | 1.11 [0.98,1.26]        | 0.09        |
| TNFRSF11B |          | rs11573901       | 1.00        | 2        | Y | 0.04 | 1.05[0.82,1.33] | 0.58 | Y        | 0.04        | 0.82 [0.60,1.10]        | 0.17        |
| TNFRSF11B |          | rs10505348       | 1.00        | 2        | Y | 0.46 | 0.91[0.83,1.00] | 0.11 | Y        | 0.47        | 1.01 [0.90,1.13]        | 0.89        |
| TNFRSF11B |          | rs10505349       | 1.00        | 2        | Y | 0.18 | 1.04[0.93,1.17] | 0.28 | Y        | 0.19        | 0.90 [0.77,1.04]        | 0.15        |
| TNFRSF11B |          | rs7014574        | 1.00        | 2        | Y | 0.47 | 0.92[0.84,1.01] | 0.15 | N        |             |                         |             |
| TNFRSF11B |          | <b>rs3134061</b> | <b>1.00</b> | <b>2</b> | Y | 0.05 | 1.12[0.90,1.38] | 0.63 | <b>Y</b> | <b>0.05</b> | <b>0.75 [0.55,1.00]</b> | <b>0.05</b> |
| TNFRSF11B |          | <b>rs3134060</b> | <b>1.00</b> | <b>2</b> | Y | 0.05 | 1.14[0.92,1.40] | 0.46 | <b>Y</b> | <b>0.05</b> | <b>0.74 [0.55,0.99]</b> | <b>0.04</b> |
| TNFRSF11B |          | rs3102725        | 1.00        | 2        | Y | 0.05 | 1.11[0.90,1.36] | 0.62 | N        |             |                         |             |
| TNFRSF11B |          | rs17758011       | 1.00        | 2        | Y | 0.05 | 1.10[0.89,1.36] | 0.80 | N        |             |                         |             |
| TNFRSF1A  | Arg92Gln |                  |             | 3        |   |      |                 |      |          |             |                         |             |
| WRN       |          | rs2737339        | 1.00        | 2        | Y | 0.39 | 1.04[0.95,1.14] | 0.31 | Y        | 0.35        | 0.91 [0.81,1.03]        | 0.14        |
| WRN       |          | rs7014045        | 0.95        | 2        | Y | 0.26 | 1.02[0.92,1.13] | 0.55 | Y        | 0.27        | 1.04 [0.91,1.19]        | 0.56        |
| WRN       |          | rs2725361        | 1.00        | 2        | Y | 0.38 | 1.03[0.94,1.13] | 0.40 | Y        | 0.35        | 0.91 [0.81,1.04]        | 0.15        |
| WRN       |          | rs2737334        | 1.00        | 2        | Y | 0.39 | 1.02[0.93,1.12] | 0.63 | Y        | 0.35        | 0.92 [0.81,1.04]        | 0.19        |
| WRN       |          | rs2737333        | 1.00        | 2        | Y | 0.40 | 1.02[0.93,1.12] | 0.58 | N        |             |                         |             |
| WRN       |          | rs2737365        | 1.00        | 2        | Y | 0.06 | 1.12[0.93,1.35] | 0.34 | Y        | 0.05        | 1.21 [0.93,1.58]        | 0.15        |
| WRN       |          | rs2737367        | 1.00        | 2        | Y | 0.06 | 1.13[0.94,1.37] | 0.28 | Y        | 0.05        | 1.21 [0.93,1.58]        | 0.14        |
| WRN       |          | rs2737368        | 1.00        | 2        | Y | 0.06 | 1.09[0.90,1.31] | 0.51 | N        |             |                         |             |

**Legend to Table 6.** Gene Symbol (Gene symbol and Gene full name are given on the next page in alphabetical order); variant, previously associated SNP; alternative SNP, rs-number of a SNP in complete or almost complete LD;  $r^2$ , LD measure,  $D'$ , LD measure (a SNP was chosen as an alternative SNP if  $r^2 \geq 0.8$  or  $D' \geq 0.9$ ); code, 1-original SNP, 2-proxy SNP, 3-no tagging SNP; QC, quality check based on intensity plots, deviation from HWE in controls  $p \leq 0.001$ , MAF  $\leq 0.01$ , or missing frequency  $\geq 0.02$  (results are only shown for those SNPs with good cluster plots (y)); MAF, Minor Allele Frequency in controls (frequency is given for the WTCCC and German Controls, respectively); OR, P-values (Cochran-Armitage trend-test) for WTCCC and German data. SNPs with positive association in either the WTCCC or German study are in bold. Genotype distributions for cases and controls in either the WTCCC or German MI Studies are available on request. Odds ratios and P values for risk associated with the minor allele were computed for each SNP using the Cochran-Armitage trend test.



**Table 6: Alphabetical list of gene symbols and gene full names**

**ABCA1**, ATP-BINDING CASSETTE 1; **ADD1**, ADDUCIN 1; **ADH1C**, ALCOHOL DEHYDROGENASE 1C; **ACDC**, ADIPONECTIN; **ADRB1**, BETA-1-ADRENERGIC RECEPTOR; **ADRB2**, BETA-2-ADRENERGIC RECEPTOR; **ADRB3**, BETA-3-ADRENERGIC RECEPTOR; **AGER**, ADVANCED GLYCOSYLATION END PRODUCT-SPECIFIC RECEPTOR; **AGT**, ANGIOTENSINOGEN; **AGTR1**, ANGIOTENSIN RECEPTOR 1; **AGTR2**, ANGIOTENSIN RECEPTOR 2; **ALOX5AP**, ARACHIDONATE 5-LIPOXYGENASE-ACTIVATING PROTEIN; **APOA1**, APOLIPOPROTEIN A-I; **APOA4**, APOLIPOPROTEIN A-IV; **APOA5**, APOLIPOPROTEIN A-V; **APOE**, APOLIPOPROTEIN E; **CCL11**, SMALL INDUCIBLE CYTOKINE A11; **CCL5**, SMALL INDUCIBLE CYTOKINE A5; **CCR2**, MONOCYTE CHEMOTACTIC PROTEIN 1 RECEPTOR; **CD14**, MONOCYTE DIFFERENTIATION ANTIGEN; **CD36**, GLYCOPROTEIN IIIb; **CETP**, CHOLESTERYL ESTER TRANSFER PROTEIN; **MHC2TA**, MHC CLASS II TRANSACTIVATOR; **COMT**, CATECHOL-O-METHYLTRANSFERASE; **CPB2**, CARBOXYPEPTIDASE B2; **CX3CR1**, G PROTEIN-COUPLED RECEPTOR 13; **CYBA**, p22-PHOX; **CYP11B2**, ALDOSTERONE SYNTHASE; **CYP1A1**, CYTOCHROME P450, SUBFAMILY I, POLYPEPTIDE 1; **CYP1A2**, CYTOCHROME P450, SUBFAMILY I, POLYPEPTIDE 2; **CYP2C9**, CYTOCHROME P450, SUBFAMILY IIC, POLYPEPTIDE 9; **ENPP1**, ECTONUCLEOTIDE PYROPHOSPHATASE/PHOSPHODIESTERASE 1; **ESR1**, ESTROGEN RECEPTOR 1; **F12**, COAGULATION FACTOR XII; **F13A1**, FACTOR XIII, A1 SUBUNIT; **F2**, COAGULATION FACTOR II; **F3**, COAGULATION FACTOR III; **F5**, COAGULATION FACTOR V; **F7**, COAGULATION FACTOR VII; **FGB**, FIBRINOGEN; **GCK**, GLUCOKINASE; **GCLM**, GLUTAMATE-CYSTEINE LIGASE; **GJA4**, CONNEXIN 37; **GNB3**, GUANINE NUCLEOTIDE-BINDING PROTEIN, BETA-3; **GP1BA**, GLYCOPROTEIN Ib; **GP6**, GLYCOPROTEIN VI; **HMOX1**, HEMOXYGENASE 1; **HTR2A**, SEROTONIN 5-HT-2A RECEPTOR; **ICAM1**, INTERCELLULAR ADHESION MOLECULE 1; **IL1B**, INTERLEUKIN 1-BETA; **IL6**, INTERLEUKIN 6; **ITGA2**, PLATELET GLYCOPROTEIN Ia/IIa; **ITGB2**, INTEGRIN, BETA-2; **ITGB3**, PLATELET GLYCOPROTEIN IIIa; **LGALS2**, GALECTIN 2; **LIPC**, HEPATIC LIPASE; **LPA**, LIPOPROTEIN(a); **LPL**, LIPOPROTEIN LIPASE; **LRP1**, LOW DENSITY LIPOPROTEIN RECEPTOR-RELATED PROTEIN 1; **LTA**, LYMPHOTOXIN-ALPHA; **MGP**, MATRIX GAMMA-CARBOXYGLUTAMIC ACID; **MMP3**, MATRIX METALLOPROTEINASE 3; **MMP9**, MATRIX METALLOPROTEINASE 9; **MTCO2**, CYTOCHROME C OXIDASE II; **MTHFR**, METHYLENETETRAHYDROFOLATE REDUCTASE; **MTR**, METHIONINE SYNTHASE; **MTTP**, tRNA-PRO, MITOCHONDRIAL; **NOS3**, NITRIC OXIDE SYNTHASE 3; **NPPA**, NATRIURETIC PEPTIDE PRECURSOR A; **NR3C1**, GLUCOCORTICOID RECEPTOR; **OLR1**, OXIDIZED LOW DENSITY LIPOPROTEIN RECEPTOR 1; **PCSK9**, NEURAL APOPTOSIS-REGULATED CONVERTASE 1; **PECAM1**, PLATELET-ENDOTHELIAL CELL ADHESION MOLECULE 1; **PLA2G7**, PHOSPHOLIPASE A2; **PON1**, PARAOXONASE 1; **PON2**, PARAOXONASE 2; **PPARA**, PEROXISOME PROLIFERATOR-ACTIVATED RECEPTOR-ALPHA; **PPARG**, PEROXISOME PROLIFERATOR-ACTIVATED RECEPTOR-GAMMA; **SELE**, SELECTIN E; **SELP**, SELECTIN P; **SELPLG**, SELECTIN P LIGAND; **TFPI**, TISSUE FACTOR PATHWAY INHIBITOR; **TGFB1**, TRANSFORMING GROWTH FACTOR; **THBD**, THROMBOMODULIN; **THBS1**, THROMBOSPONDIN I; **THBS4**, THROMBOSPONDIN IV; **TLR4**, TOLL-LIKE RECEPTOR 4; **TNF**, TUMOR NECROSIS FACTOR; **TNFRSF11B**, OSTEOPROTEGERIN; **TNFRSF1A**, TUMOR NECROSIS FACTOR RECEPTOR 1; **WRN**, DNA HELICASE

**Supplementary Table 7.** Reasons for exclusion of subjects in WTCCC and German MI

## Family Study

| <i>Collection</i>                | <b>WTCCC Study</b> |                      |                      |              | <b>German MI Family Study</b> |                    |              |
|----------------------------------|--------------------|----------------------|----------------------|--------------|-------------------------------|--------------------|--------------|
|                                  | <b>CAD cases</b>   | <b>58BC controls</b> | <b>UKBS controls</b> | <b>Total</b> | <b>MI cases</b>               | <b>MI controls</b> | <b>Total</b> |
| Missingness (per individual) >3% | 41                 | 9                    | 8                    | 58           | 7                             | -                  | 7            |
| Low heterozygosity               | 1                  | 0                    | 0                    | 1            | 6                             | -                  | 6            |
| External discordance             | 0                  | 4                    | 5                    | 9            | -                             | -                  | -            |
| Non-European ancestry            | 13                 | 6                    | 14                   | 33           | -                             | -                  | -            |
| Duplicate                        | 2                  | 4                    | 0                    | 1            | -                             | -                  | -            |
| Cryptic relatedness              | 5                  | 1                    | 15                   | 21           | -                             | -                  | -            |
| <b>Total</b>                     | <b>62</b>          | <b>24</b>            | <b>42</b>            | <b>128</b>   | <b>13</b>                     | <b>-</b>           | <b>13</b>    |

CAD, coronary artery disease. 58BC, 1958 birth cohort. UKBS, blood donors recruited by United Kingdom Blood Service. Several filters were applied by the WTCCC Consortium to the WTCCC Study for sample exclusion<sup>3</sup> 1. SNP call rate < 97% (missingness). 2. Heterozygosity > 30% or < 23% across all SNPs. 3. External discordance with genotype or phenotype data. 4. Individuals identified as having non-European ancestry by PCA analysis. 5. Duplicates (the copy with more missing data was removed) 6. Individuals with too much IBS sharing (>86%); likely relatives. Some of the filters were also applied to the German Study as shown.

**Supplementary Table 8.** Sensitivity analysis for the False Positive Report Probability (FPRP) for the SNPs shown in Supplementary Table 2. Analysis presented in the paper are based on an alternative odds ratio of 1.25 and a prior probability of a true association of 1/5000.

| Chromosome | SNP        | OR=1.20 |        |         | OR=1.25 |        |         | OR=1.30 |        |         | Minimum FPRP | Maximum FPRP | Full Bayesian |
|------------|------------|---------|--------|---------|---------|--------|---------|---------|--------|---------|--------------|--------------|---------------|
|            |            | 1/2500  | 1/5000 | 1/10000 | 1/2500  | 1/5000 | 1/10000 | 1/2500  | 1/5000 | 1/10000 |              |              |               |
| 1          | rs2133189  | 0.303   | 0.465  | 0.635   | 0.309   | 0.473  | 0.642   | 0.490   | 0.658  | 0.794   | 0.303        | 0.794        | 0.475         |
| 1          | rs17465637 | 0.256   | 0.408  | 0.580   | 0.249   | 0.399  | 0.570   | 0.398   | 0.569  | 0.725   | 0.249        | 0.725        | 0.402         |
| 2          | rs2943634  | 0.271   | 0.426  | 0.597   | 0.303   | 0.466  | 0.635   | 0.528   | 0.691  | 0.817   | 0.271        | 0.817        | 0.466         |
| 5          | rs383830   | 0.235   | 0.381  | 0.551   | 0.155   | 0.269  | 0.424   | 0.166   | 0.285  | 0.444   | 0.155        | 0.551        | 0.269         |
| 5          | rs449650   | 0.254   | 0.405  | 0.577   | 0.174   | 0.296  | 0.457   | 0.190   | 0.319  | 0.484   | 0.174        | 0.577        | 0.295         |
| 5          | rs565928   | 0.233   | 0.378  | 0.549   | 0.156   | 0.270  | 0.425   | 0.170   | 0.291  | 0.450   | 0.156        | 0.549        | 0.271         |
| 6          | rs6922269  | 0.187   | 0.315  | 0.479   | 0.170   | 0.291  | 0.451   | 0.277   | 0.434  | 0.605   | 0.170        | 0.605        | 0.290         |
| 9          | rs643319   | 0.002   | 0.005  | 0.009   | 0.001   | 0.002  | 0.005   | 0.002   | 0.003  | 0.006   | 0.001        | 0.009        | 0.003         |
| 9          | rs7044859  | 0.003   | 0.007  | 0.013   | 0.002   | 0.004  | 0.007   | 0.003   | 0.005  | 0.010   | 0.002        | 0.013        | 0.005         |
| 9          | rs523096   | 0.049   | 0.094  | 0.172   | 0.049   | 0.094  | 0.172   | 0.112   | 0.202  | 0.336   | 0.049        | 0.336        | 0.098         |
| 9          | rs518394   | 0.049   | 0.094  | 0.171   | 0.048   | 0.092  | 0.169   | 0.108   | 0.195  | 0.327   | 0.048        | 0.327        | 0.095         |
| 9          | rs10757264 | 0.010   | 0.019  | 0.037   | 0.007   | 0.013  | 0.026   | 0.011   | 0.022  | 0.044   | 0.007        | 0.044        | 0.015         |
| 9          | rs10965212 | 0.000   | 0.000  | 0.001   | 0.000   | 0.000  | 0.000   | 0.000   | 0.000  | 0.000   | 0.000        | 0.001        | 0.000         |
| 9          | rs1292136  | 0.001   | 0.001  | 0.002   | 0.000   | 0.000  | 0.001   | 0.000   | 0.000  | 0.001   | 0.000        | 0.002        | 0.001         |
| 9          | rs7049105  | 0.000   | 0.000  | 0.001   | 0.000   | 0.000  | 0.000   | 0.000   | 0.000  | 0.000   | 0.000        | 0.001        | 0.000         |
| 9          | rs10965215 | 0.000   | 0.000  | 0.000   | 0.000   | 0.000  | 0.000   | 0.000   | 0.000  | 0.000   | 0.000        | 0.000        | 0.000         |
| 9          | rs564398   | 0.002   | 0.003  | 0.007   | 0.001   | 0.001  | 0.003   | 0.001   | 0.002  | 0.003   | 0.001        | 0.007        | 0.002         |
| 9          | rs7865618  | 0.000   | 0.001  | 0.001   | 0.000   | 0.000  | 0.000   | 0.000   | 0.000  | 0.000   | 0.000        | 0.001        | 0.000         |
| 9          | rs10965219 | 0.000   | 0.000  | 0.000   | 0.000   | 0.000  | 0.000   | 0.000   | 0.000  | 0.000   | 0.000        | 0.000        | 0.000         |
| 9          | rs9632884  | 0.000   | 0.000  | 0.000   | 0.000   | 0.000  | 0.000   | 0.000   | 0.000  | 0.000   | 0.000        | 0.000        | 0.000         |
| 9          | rs6475606  | 0.000   | 0.000  | 0.000   | 0.000   | 0.000  | 0.000   | 0.000   | 0.000  | 0.000   | 0.000        | 0.000        | 0.000         |
| 9          | rs4977574  | 0.000   | 0.000  | 0.000   | 0.000   | 0.000  | 0.000   | 0.000   | 0.000  | 0.000   | 0.000        | 0.000        | 0.000         |
| 9          | rs2891168  | 0.000   | 0.000  | 0.000   | 0.000   | 0.000  | 0.000   | 0.000   | 0.000  | 0.000   | 0.000        | 0.000        | 0.000         |
| 9          | rs1333042  | 0.000   | 0.000  | 0.000   | 0.000   | 0.000  | 0.000   | 0.000   | 0.000  | 0.000   | 0.000        | 0.000        | 0.000         |
| 9          | rs1333048  | 0.000   | 0.000  | 0.000   | 0.000   | 0.000  | 0.000   | 0.000   | 0.000  | 0.000   | 0.000        | 0.000        | 0.000         |
| 9          | rs1333049  | 0.000   | 0.000  | 0.000   | 0.000   | 0.000  | 0.000   | 0.000   | 0.000  | 0.000   | 0.000        | 0.000        | 0.000         |
| 16         | rs8055236  | 0.341   | 0.509  | 0.674   | 0.236   | 0.382  | 0.553   | 0.242   | 0.390  | 0.561   | 0.236        | 0.674        | 0.376         |
| 16         | rs889595   | 0.270   | 0.425  | 0.596   | 0.267   | 0.421  | 0.593   | 0.427   | 0.598  | 0.748   | 0.267        | 0.748        | 0.425         |
| 22         | rs688034   | 0.179   | 0.304  | 0.466   | 0.200   | 0.334  | 0.501   | 0.394   | 0.566  | 0.723   | 0.179        | 0.723        | 0.327         |

The sensitivity analysis ranges the probability of a true association between 1/2500 and 1/10000 and the true odds ratio (OR) between 1.2 and 1.3. The Full Bayesian analysis used independent normal prior distributions for the log odds ratio and logit of the probability of a true association that were centred on an odds ratio of 1.25 and a probability of 1/5000 with standard deviations that allowed 95% of the distribution to be between 1.2 and 1.3 and between 1/2500 and 1/10,000 respectively. The full Bayesian results are very similar to those obtained from the modification of the Wacholder method<sup>9</sup> assuming 1.25 and 1/5000.

## 8. Supplementary Figures

**Supplementary Figures 1A-1F. Overview of the associations observed on chromosomes 6q25.1 (Figure 1A) , 2q36.3 (Figure 1B). 1p13.3 (Figure 1C), 1q41 (Figure 1D), 10q11.21 (Figure 1E) and 15q22.33 (Figure 1F).**

In each figure the following legends apply:

A. Plot of  $-\log_{10}$  P values (Cochran-Armitage trend test) for association against chromosome position (bases). Blue triangles represent the WTCCC study and red circles represent the German study. For both studies the P values are from the two-sided Cochran-Armitage trend-test. The arrows mark the lead SNP in each region (see Main paper) for both studies.

B. Genomic locations of RefSeq genes or mRNAs showing intron and exon structure. Spliced ESTs shown are the genomic locations of alignments (except those overlapping known genes in region where spliced ESTs are not shown) between human ESTs in GenBank and the genome, that show signs of splicing when aligned against the genome. All data obtained from the UCSC genome browser (NCBI Build 35).<sup>20</sup>

C. Red boxes represent recombination hotspots as estimated from Phase II HapMap data (release 21) using the methods described in McVean et al. (2004) and Winckler et al. (2005).<sup>21,22</sup>

D. Haploview plot of linkage disequilibrium ( $D'$ ) for SNPs genotyped in WTCCC CAD cases constructed as described by<sup>23</sup>. Colour scheme:  $D' < 1$  and  $\text{LOD} < 2$  = white,  $D' = 1$  and  $\text{LOD} < 2$  = blue,  $D' < 1$  and  $\text{LOD} \geq 2$  = shades of pink/red,  $D' = 1$  and  $\text{LOD} \geq 2$  = bright red.

E. Haploview plot of linkage disequilibrium ( $|D'|$ ) for all HapMap SNPs across the region (HapMap CEU data). Colour scheme as for **D**.

## SUPPLEMENTARY FIGURE 1A

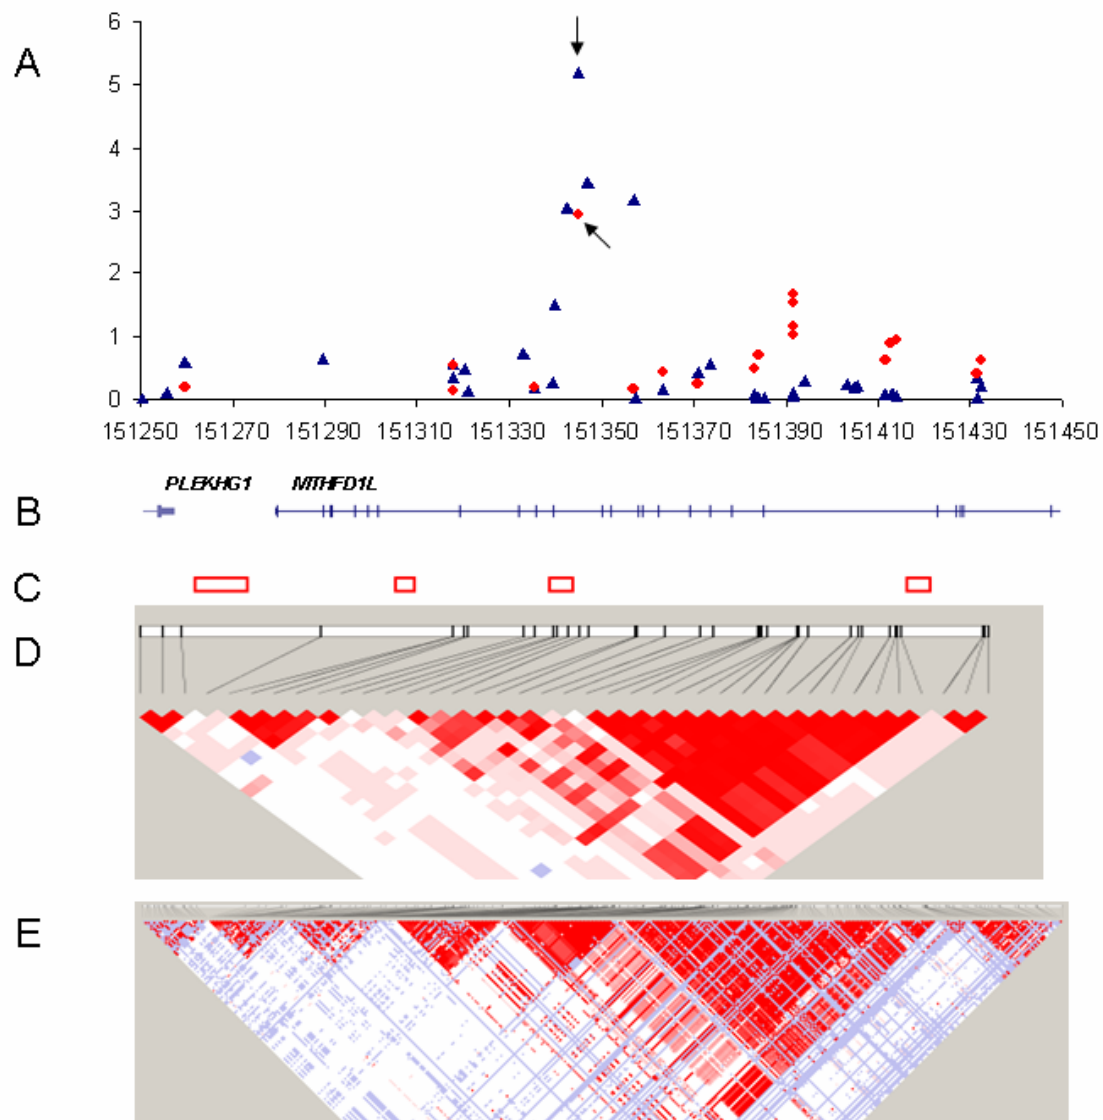

## SUPPLEMENTARY FIGURE 1B

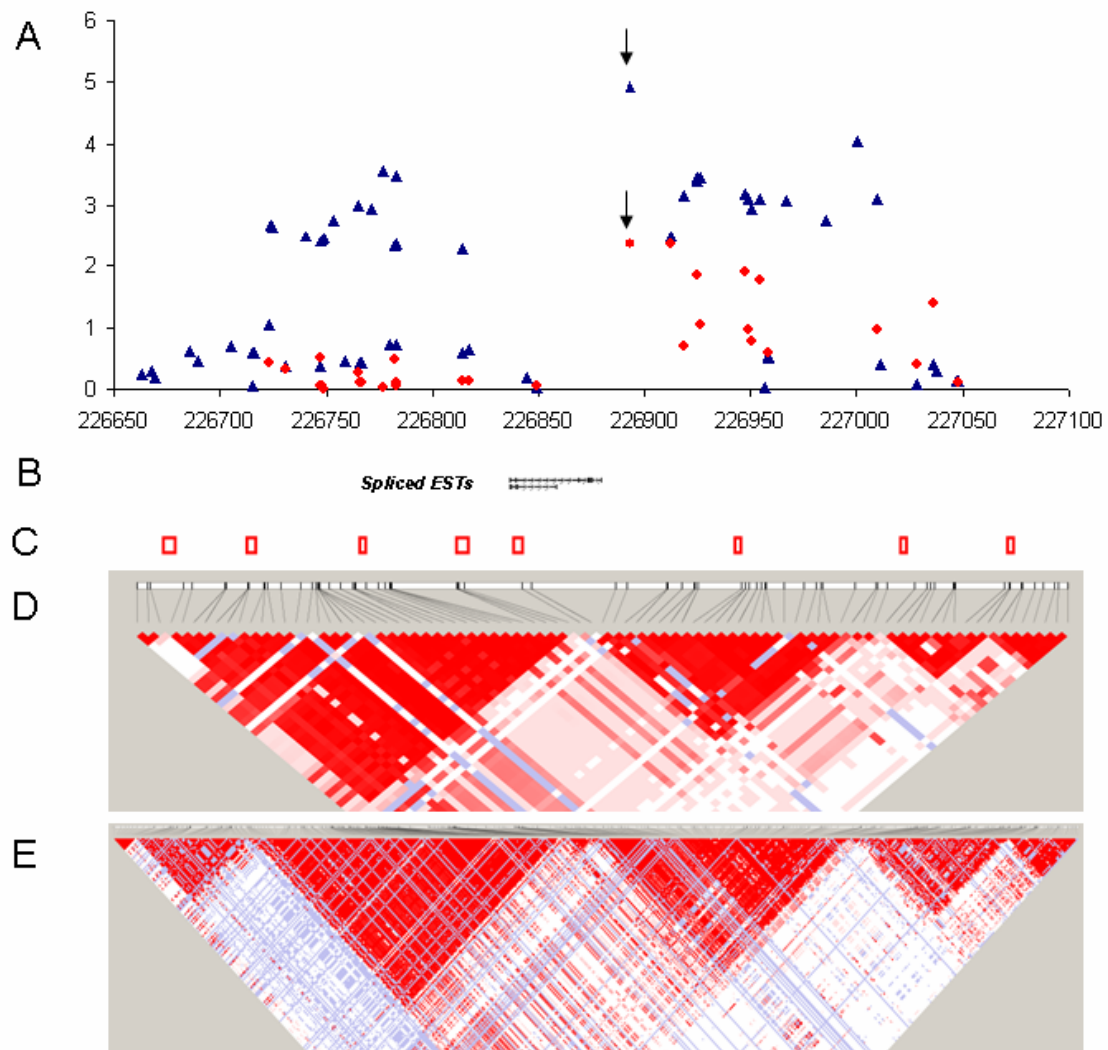

## SUPPLEMENTARY FIGURE 1C

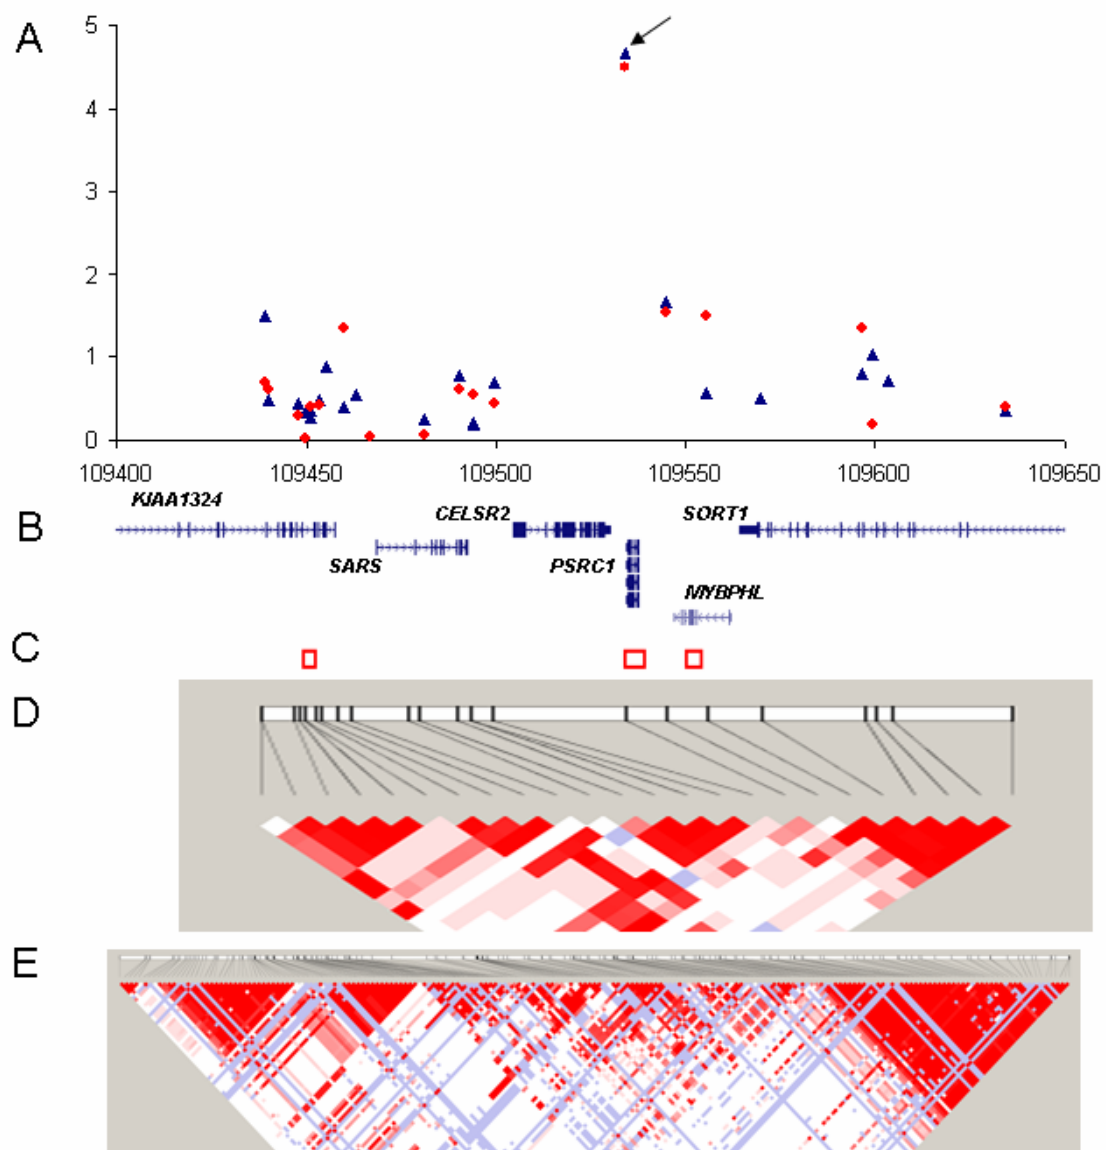



## SUPPLEMENTARY FIGURE 1D

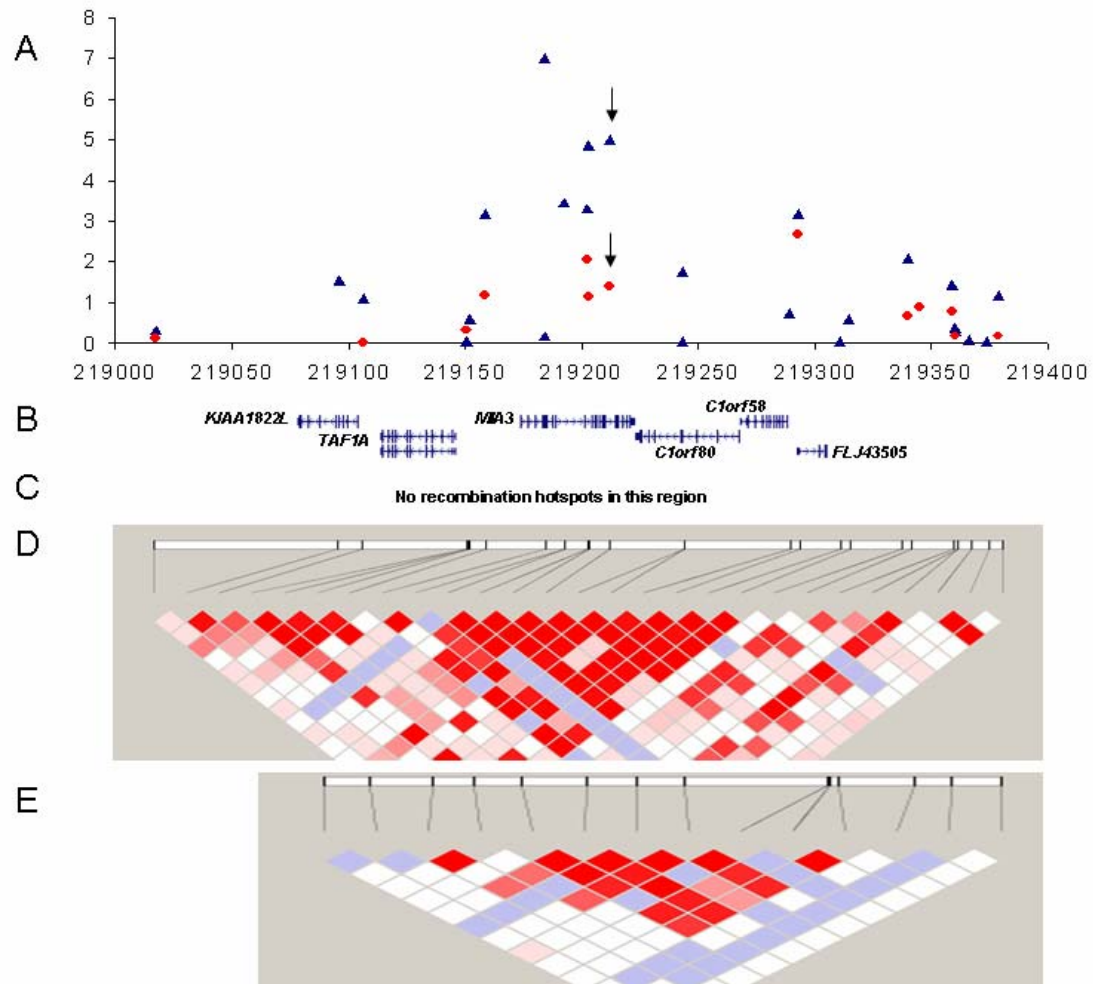

## SUPPLEMENTARY FIGURE 1E

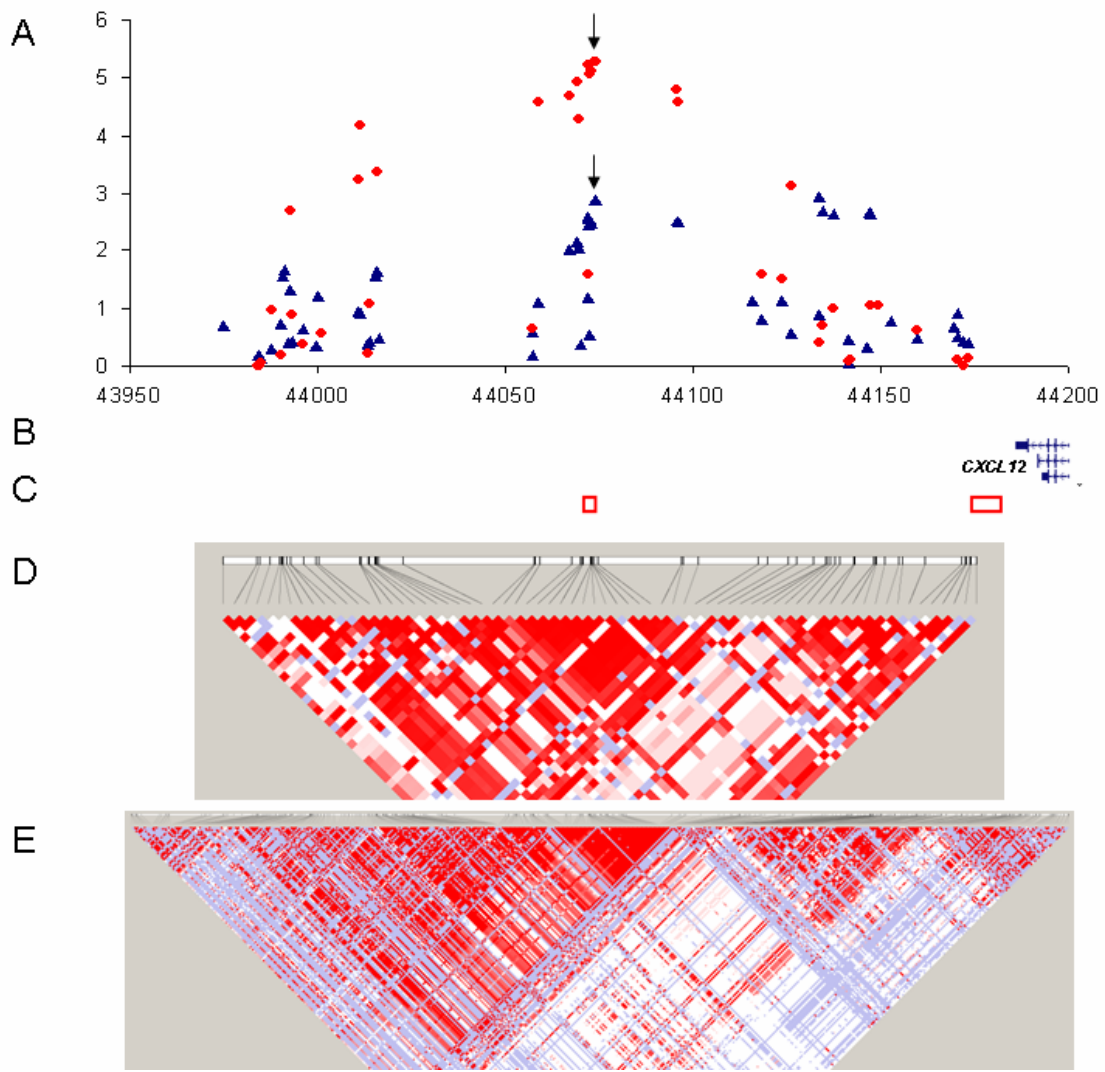

## SUPPLEMENTARY FIGURE 1F

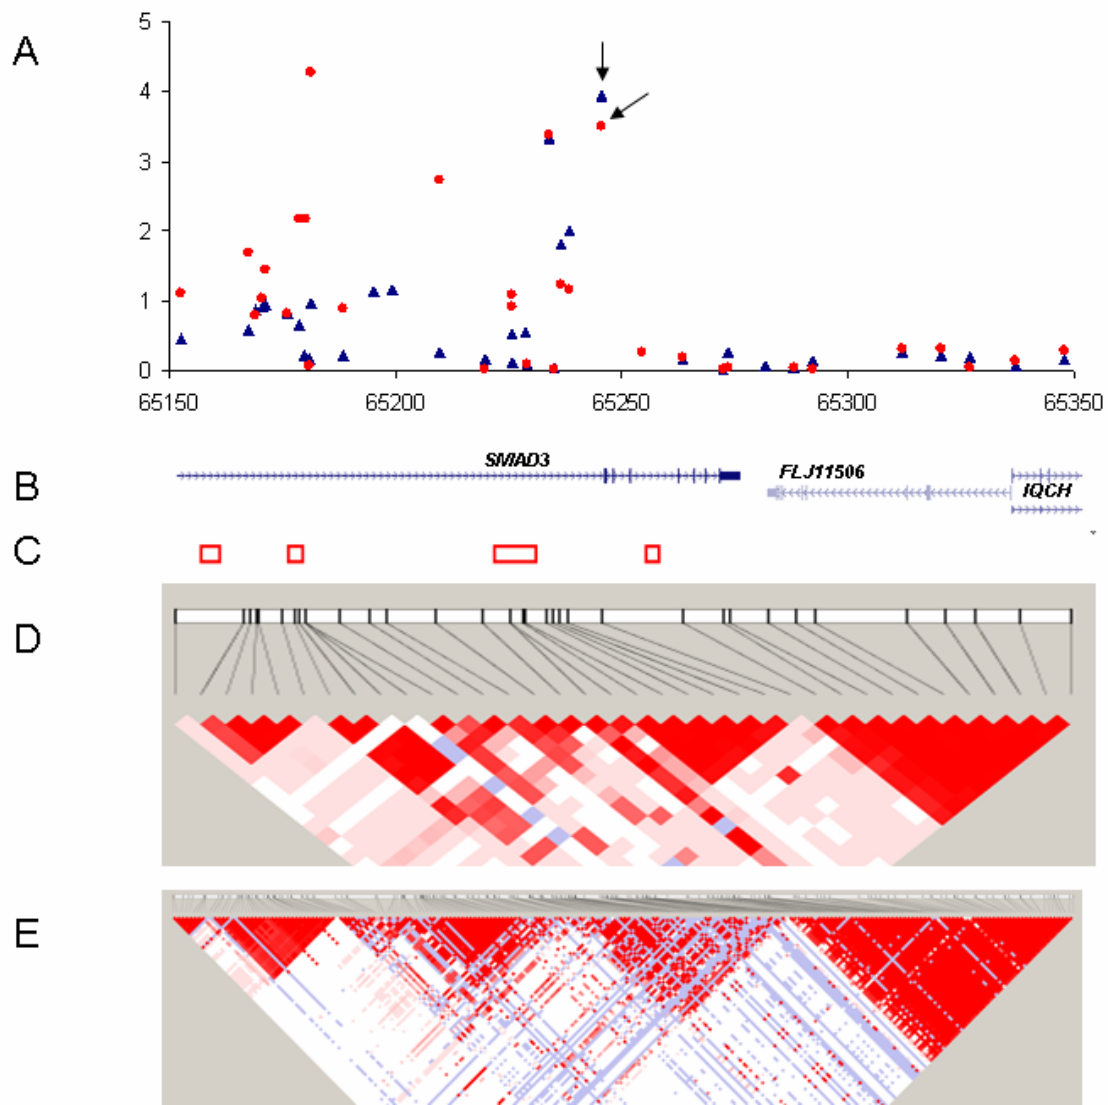

**Figure 2. QQ-Plot of the WTCCC Study and German Study data**

The QQ-plot includes all SNPs that passed the inclusion criteria (see Supplementary Materials section 2).

**Figure 2A. WTCCC Study**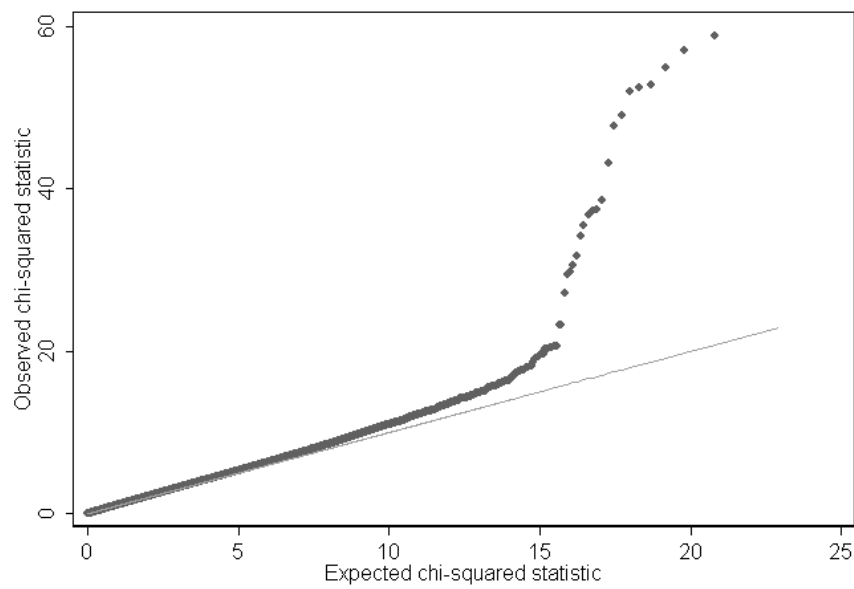**Figure 2B. German Study**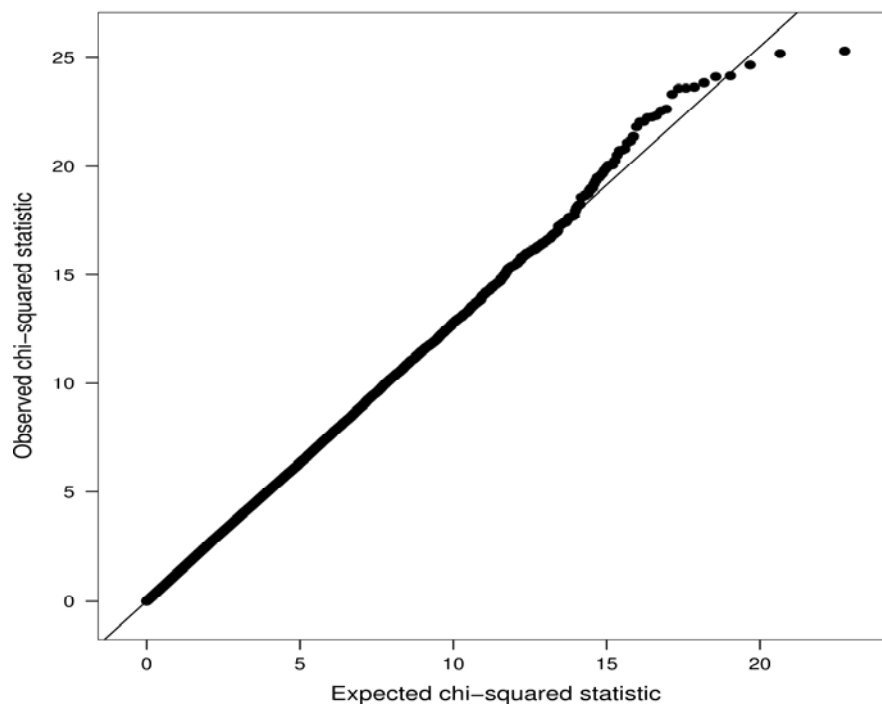

## 9. Supplementary References

1. Samani NJ, Burton P, Mangino M, et al. A genomewide linkage study of 1,933 families affected by premature coronary artery disease: The British Heart Foundation (BHF) Family Heart Study. *Am J Hum Genet* 2005; 77(6):1011-20.
2. Alfakih K, Brown B, Lawrance RA, et al. Effect of a common X-linked angiotensin II type 2-receptor gene polymorphism (-1332 G/A) on the occurrence of premature myocardial infarction and stenotic atherosclerosis requiring revascularization. *Atherosclerosis* 2007 [Epub ahead of print].
3. The Wellcome Trust Case Control Consortium. Genomewide association study of 14,000 cases of seven common diseases and 3,000 shared controls. *Nature* 2007 (in press).
4. Broeckel U, Hengstenberg C, Mayer B, et al. A comprehensive linkage analysis for myocardial infarction and its related risk factors. *Nat Genet* 2002; 30(2):210-4.
5. Fischer M, Broeckel U, Holmer S, et al. Distinct heritable patterns of angiographic coronary artery disease in families with myocardial infarction. *Circulation* 2005; 111(7):855-62.
6. Wichmann HE, Gieger C, Illig T. KORA-gen--resource for population genetics, controls and a broad spectrum of disease phenotypes. *Gesundheitswesen* 2005; 67 Suppl 1:S26-S30.
7. Devlin B, Roeder K. Genomic control for association studies. *Biometrics* 1999; 55(4):997-1004.
8. Steffens M, Lamina C, Illig T, et al. SNP-based analysis of genetic substructure in the German population. *Human Heredity* 2006; 62(1):20-9.
9. Wacholder S, Chanock S, Garcia-Closas M, El GL, Rothman N. Assessing the probability that a positive report is false: an approach for molecular epidemiology studies. *J Natl Cancer Inst* 2004; 96(6):434-42.
10. Mayer B, Erdmann J, Schunkert H. Genetics and heritability of coronary artery disease and myocardial infarction. *Clin Res Cardiol* 2007; 96(1):1-7.
11. Glantz SA. *Primer of biostatistics*. New York: 4th ed. McGraw Hill; 2005.
12. Brady AR. Adjusted population attributable fractions from logistic regression. *Stat Tech Bull* 1998 (42):8-12.
13. Mayer B, Lieb W, Gotz A, et al. Association of the T8590C polymorphism of CYP4A11 with hypertension in the MONICA Augsburg echocardiographic substudy. *Hypertension* 2005; 46(4):766-71.
14. Assmann G, Cullen P, Schulte H. Simple scoring scheme for calculating the risk of acute coronary events based on the 10-year follow-up of the prospective cardiovascular Munster (PROCAM) study. *Circulation* 2002; 105(3):310-5.
15. Wilson PW, D'Agostino RB, Levy D, Belanger AM, Silbershatz H, Kannel WB. Prediction of coronary heart disease using risk factor categories. *Circulation* 1998; 97(18):1837-47.

16. Royston P, Ambler G, Sauerbrei W. The use of fractional polynomials to model continuous risk variables in epidemiology. *Int J Epidemiol* 1999; 28(5):964-74.
17. McCullagh P, Nelder JA. *Generalized Linear Models*. 2nd Edition ed. London: Chapman & Hall 1989.
18. Tregouet D, Garelle V. A new JAVA interface implementation of THESIAS: Testing Haplotype EffectS In Association Studies. *Bioinformatics* 2007 [Epub ahead of print].
19. Morgan TM, Krumholz HM, Lifton RP, Spertus JA. Nonvalidation of reported genetic risk factors for acute coronary syndrome in a large-scale replication study. *JAMA* 2007; 297(14):1551-61.
20. Karolchik D, Baertsch R, Diekhans M, et al. The UCSC Genome Browser Database. *Nucleic Acids Res* 2003; 31(1):51-4.
21. McVean GA, Myers SR, Hunt S, Deloukas P, Bentley DR, Donnelly P. The fine-scale structure of recombination rate variation in the human genome. *Science* 2004; 304(5670):581-4.
22. Winckler W, Myers SR, Richter DJ, et al. Comparison of fine-scale recombination rates in humans and chimpanzees. *Science* 2005; 308(5718):107-11.
23. Barrett JC, Fry B, Maller J, Daly MJ. Haploview: analysis and visualization of LD and haplotype maps. *Bioinformatics* 2005; 21(2):263-5.

## 10. WTCCC Consortium

**Management Committee:** Paul R Burton<sup>1</sup>, David G Clayton<sup>2</sup>, Lon R Cardon<sup>3</sup>, Nick Craddock<sup>4</sup>, Panos Deloukas<sup>5</sup>, Audrey Duncanson<sup>6</sup>, Dominic P Kwiatkowski<sup>3,5</sup>, Mark I McCarthy<sup>3,7</sup>, Willem H Ouwehand<sup>8,9</sup>, Nilesh J Samani<sup>10</sup>, John A Todd<sup>2</sup>, Peter Donnelly (Chair)<sup>11</sup>

**Analysis Committee:** Jeffrey C Barrett<sup>3</sup>, Paul R Burton<sup>1</sup>, Dan Davison<sup>11</sup>, Peter Donnelly<sup>11</sup>, Doug Easton<sup>12</sup>, David Evans<sup>3</sup>, Hin-Tak Leung<sup>2</sup>, Jonathan L Marchini<sup>11</sup>, Andrew P Morris<sup>3</sup>, Chris CA Spencer<sup>11</sup>, Martin D Tobin<sup>1</sup>, Lon R Cardon (Co-chair)<sup>3</sup>, David G Clayton (Co-chair)<sup>2</sup>

**UK Blood Services & University of Cambridge Controls:** Antony P Attwood<sup>5,8</sup>, James P Boorman<sup>8,9</sup>, Barbara Cant<sup>8</sup>, Ursula Everson<sup>13</sup>, Judith M Hussey<sup>14</sup>, Jennifer D Jolley<sup>8</sup>, Alexandra S Knight<sup>8</sup>, Kerstin Koch<sup>8</sup>, Elizabeth Meech<sup>15</sup>, Sarah Nutland<sup>2</sup>, Christopher V Prowse<sup>16</sup>, Helen E Stevens<sup>2</sup>, Niall C Taylor<sup>8</sup>, Graham R Walters<sup>17</sup>, Neil M Walker<sup>2</sup>, Nicholas A Watkins<sup>8,9</sup>, Thilo Winzer<sup>8</sup>, John A Todd<sup>2</sup>, Willem H Ouwehand<sup>8,9</sup>

**1958 Birth Cohort Controls:** Richard W Jones<sup>18</sup>, Wendy L McArdle<sup>18</sup>, Susan M Ring<sup>18</sup>, David P Strachan<sup>19</sup>, Marcus Pembrey<sup>18,20</sup>

**Bipolar Disorder (Aberdeen):** Gerome Breen<sup>21</sup>, David St Clair<sup>21</sup>; **(Birmingham):** Sian Caesar<sup>22</sup>, Katherine Gordon-Smith<sup>22,23</sup>, Lisa Jones<sup>22</sup>; **(Cardiff):** Christine Fraser<sup>23</sup>, Elaine K Green<sup>23</sup>, Detelina Grozeva<sup>23</sup>, Marian L Hamshere<sup>23</sup>, Peter A Holmans<sup>23</sup>, Ian R Jones<sup>23</sup>, George Kirov<sup>23</sup>, Valentina Moskvina<sup>23</sup>, Ivan Nikolov<sup>23</sup>, Michael C O'Donovan<sup>23</sup>, Michael J Owen<sup>23</sup>, Nick Craddock<sup>23</sup>; **(London):** David A Collier<sup>24</sup>, Amanda Elkin<sup>24</sup>, Anne Farmer<sup>24</sup>, Richard Williamson<sup>24</sup>, Peter McGuffin<sup>24</sup>; **(Newcastle):** Allan H Young<sup>25</sup>, I Nicol Ferrier<sup>25</sup>

**Coronary Artery Disease (Leeds):** Stephen G Ball<sup>26</sup>, Anthony J Balmforth<sup>26</sup>, Jennifer H Barrett<sup>26</sup>, D Timothy Bishop<sup>26</sup>, Mark M Iles<sup>26</sup>, Azhar Maqbool<sup>26</sup>, Nadira Yuldasheva<sup>26</sup>, Alistair S Hall<sup>26</sup>; **(Leicester):** Peter S Braund<sup>10</sup>, Paul R Burton<sup>1</sup>, Richard J Dixon<sup>10</sup>, Massimo Mangino<sup>10</sup>, Suzanne Stevens<sup>10</sup>, Martin D Tobin<sup>1</sup>, John R Thompson<sup>1</sup>, Nilesh J Samani<sup>10</sup>

**Crohn's Disease (Cambridge):** Francesca Bredin<sup>27</sup>, Mark Tremelling<sup>27</sup>, Miles Parkes<sup>27</sup>. **(Edinburgh):** Hazel Drummond<sup>28</sup>, Charles W Lees<sup>28</sup>, Elaine R Nimmo<sup>28</sup>, Jack Satsangi<sup>28</sup>; **(London):** Sheila A Fisher<sup>29</sup>, Alastair Forbes<sup>30</sup>, Cathryn M Lewis<sup>29</sup>, Clive M Onnie<sup>29</sup>, Natalie J Prescott<sup>29</sup>, Jeremy Sanderson<sup>31</sup>, Christopher G Mathew<sup>29</sup>; **(Newcastle):** Jamie Barbour<sup>32</sup>, M Khalid Mohiuddin<sup>32</sup>, Catherine E Todhunter<sup>32</sup>, John C Mansfield<sup>32</sup>; **(Oxford):** Tariq Ahmad<sup>33</sup>, Fraser R Cummings<sup>33</sup>, Derek P Jewell<sup>33</sup>

**Hypertension (Aberdeen):** John Webster<sup>34</sup>; **(Cambridge):** Morris J Brown<sup>35</sup>, David G Clayton<sup>2</sup>; **(Evry, France):** G Mark Lathrop<sup>36</sup>; **(Glasgow):** John Connell<sup>37</sup>, Anna Dominiczak<sup>37</sup>; **(Leicester):** Nilesh J Samani<sup>10</sup>; **(London):** Carolina A Braga Marcano<sup>38</sup>, Beverley Burke<sup>38</sup>, Richard Dobson<sup>38</sup>, Johannie Gungadoo<sup>38</sup>, Kate L Lee<sup>38</sup>, Patricia B Munroe<sup>38</sup>, Stephen J Newhouse<sup>38</sup>, Abiodun Onipinla<sup>38</sup>, Chris Wallace<sup>38</sup>, Mingzhan Xue<sup>38</sup>, Mark Caulfield<sup>38</sup>; **(Oxford):** Martin Farrall<sup>39</sup>

**Rheumatoid Arthritis:** Anne Barton<sup>40</sup>, The Biologics in RA Genetics and Genomics Study Syndicate (BRAGGS) Steering Committee\*, Ian N Bruce<sup>40</sup>, Hannah Donovan<sup>40</sup>, Steve Eyre<sup>40</sup>, Paul D Gilbert<sup>40</sup>, Samantha L Hider<sup>40</sup>, Anne M Hinks<sup>40</sup>, Sally L John<sup>40</sup>, Catherine Potter<sup>40</sup>, Alan J Silman<sup>40</sup>, Deborah PM Symmons<sup>40</sup>, Wendy Thomson<sup>40</sup>, Jane Worthington<sup>40</sup>

**Type 1 Diabetes:** David G Clayton<sup>2</sup>, David B Dunger<sup>2,41</sup>, Sarah Nutland<sup>2</sup>, Helen E Stevens<sup>2</sup>, Neil M Walker<sup>2</sup>, Barry Widmer<sup>2,41</sup>, John A Todd<sup>2</sup>

**Type 2 Diabetes (Exeter):** Timothy M Frayling<sup>42,43</sup>, Rachel M Freathy<sup>42,43</sup>, Hana Lango<sup>42,43</sup>, John R B Perry<sup>42,43</sup>, Beverley M Shields<sup>43</sup>, Michael N Weedon<sup>42,43</sup>, Andrew T Hattersley<sup>42,43</sup>; **(London):** Graham A Hitman<sup>44</sup>; **(Newcastle):** Mark Walker<sup>45</sup>; **(Oxford):** Kate S Elliott<sup>3,7</sup>, Christopher J Groves<sup>7</sup>, Cecilia M Lindgren<sup>3,7</sup>, Nigel W Rayner<sup>3,7</sup>, Nicholas J Timpson<sup>3,46</sup>, Eleftheria Zeggini<sup>3,7</sup>, Mark I McCarthy<sup>3,7</sup>

**Tuberculosis (Gambia):** Melanie Newport<sup>47</sup>, Giorgio Sirugo<sup>47</sup>; **(Oxford):** Emily Lyons<sup>3</sup>, Fredrik Vannberg<sup>3</sup>, Adrian VS Hill<sup>3</sup>

**Ankylosing Spondylitis:** Linda A Bradbury<sup>48</sup>, Claire Farrar<sup>49</sup>, Jennifer J Pointon<sup>48</sup>, Paul Wordsworth<sup>49</sup>, Matthew A Brown<sup>48,49</sup>

**AutoImmune Thyroid Disease:** Jayne A Franklyn<sup>50</sup>, Joanne M Heward<sup>50</sup>, Matthew J Simmonds<sup>50</sup>, Stephen CL Gough<sup>50</sup>  
**Breast Cancer:** Sheila Seal<sup>51</sup>, Breast Cancer Susceptibility Collaboration (UK)\*, Michael R Stratton<sup>51,52</sup>, Nazneen Rahman<sup>51</sup>  
**Multiple Sclerosis:** Maria Ban<sup>53</sup>, An Goris<sup>53</sup>, Stephen J Sawcer<sup>53</sup>, Alastair Compston<sup>53</sup>  
**Gambian Controls (Gambia):** David Conway<sup>47</sup>, Muminatou Jallow<sup>47</sup>, Melanie Newport<sup>47</sup>, Giorgio Sirugo<sup>47</sup>; **(Oxford):** Kirk A Rockett<sup>3</sup>, Dominic P Kwiatkowski<sup>3,5</sup>  
**DNA, Genotyping, Data QC and Informatics (Wellcome Trust Sanger Institute, Hinxton):** Suzannah J Bumpstead<sup>5</sup>, Amy Chaney<sup>5</sup>, Kate Downes<sup>2,5</sup>, Mohammed JR Ghorri<sup>5</sup>, Rhian Gwilliam<sup>5</sup>, Sarah E Hunt<sup>5</sup>, Michael Inouye<sup>5</sup>, Andrew Keniry<sup>5</sup>, Emma King<sup>5</sup>, Ralph McGinnis<sup>5</sup>, Simon Potter<sup>5</sup>, Rathi Ravindrarajah<sup>5</sup>, Pamela Whittaker<sup>5</sup>, Claire Widden<sup>5</sup>, David Withers<sup>5</sup>, Panos Deloukas<sup>5</sup>; **(Cambridge):** Hin-Tak Leung<sup>2</sup>, Sarah Nutland<sup>2</sup>, Helen E Stevens<sup>2</sup>, Neil M Walker<sup>2</sup>, John A Todd<sup>2</sup>  
**Statistics (Cambridge):** Doug Easton<sup>12</sup>, David G Clayton<sup>2</sup>; **(Leicester):** Paul R Burton<sup>1</sup>, Martin D Tobin<sup>1</sup>; **(Oxford):** Jeffrey C Barrett<sup>3</sup>, David Evans<sup>3</sup>, Andrew P Morris<sup>3</sup>, Lon R Cardon<sup>3</sup>; **(Oxford):** Niall J Cardin<sup>11</sup>, Dan Davison<sup>11</sup>, Teresa Ferreira<sup>11</sup>, Joanne Pereira-Gale<sup>11</sup>, Ingeleif B Hallgrimsdóttir<sup>11</sup>, Bryan N Howie<sup>11</sup>, Jonathan L Marchini<sup>11</sup>, Chris CA Spencer<sup>11</sup>, Zhan Su<sup>11</sup>, Yik Ying Teo<sup>3,11</sup>, Damjan Vukcevic<sup>11</sup>, Peter Donnelly<sup>11</sup>  
**PIs:** David Bentley<sup>5,54</sup>, Matthew A Brown<sup>48,49</sup>, Lon R Cardon<sup>3</sup>, Mark Caulfield<sup>38</sup>, David G Clayton<sup>2</sup>, Alistair Compston<sup>53</sup>, Nick Craddock<sup>23</sup>, Panos Deloukas<sup>5</sup>, Peter Donnelly<sup>11</sup>, Martin Farrall<sup>39</sup>, Stephen CL Gough<sup>50</sup>, Alistair S Hall<sup>26</sup>, Andrew T Hattersley<sup>42,43</sup>, Adrian VS Hill<sup>3</sup>, Dominic P Kwiatkowski<sup>3,5</sup>, Christopher G Mathew<sup>29</sup>, Mark I McCarthy<sup>3,7</sup>, Willem H Ouwehand<sup>8,9</sup>, Miles Parkes<sup>27</sup>, Marcus Pembrey<sup>18,20</sup>, Nazneen Rahman<sup>51</sup>, Nilesh J Samani<sup>10</sup>, Michael R Stratton<sup>51,52</sup>, John A Todd<sup>2</sup>, Jane Worthington<sup>40</sup>

<sup>1</sup> Genetic Epidemiology Group, Department of Health Sciences, University of Leicester, Adrian Building, University Road, Leicester, LE1 7RH, UK; <sup>2</sup> Juvenile Diabetes Research Foundation/Wellcome Trust Diabetes and Inflammation Laboratory, Department of Medical Genetics, Cambridge Institute for Medical Research, University of Cambridge, Wellcome Trust/MRC Building, Cambridge, CB2 0XY, UK; <sup>3</sup> Wellcome Trust Centre for Human Genetics, University of Oxford, Roosevelt Drive, Oxford OX3 7BN, UK; <sup>4</sup> Department of Psychological Medicine, Henry Wellcome Building, School of Medicine, Cardiff University, Heath Park, Cardiff CF14 4XN, UK; <sup>5</sup> The Wellcome Trust Sanger Institute, Wellcome Trust Genome Campus, Hinxton, Cambridge CB10 1SA, UK; <sup>6</sup> The Wellcome Trust, Gibbs Building, 215 Euston Road, London NW1 2BE, UK; <sup>7</sup> Oxford Centre for Diabetes, Endocrinology and Medicine, University of Oxford, Churchill Hospital, Oxford, OX3 7LJ, UK; <sup>8</sup> Department of Haematology, University of Cambridge, Long Road, Cambridge, CB2 2PT, UK; <sup>9</sup> National Health Service Blood and Transplant, Cambridge Centre, Long Road, Cambridge, CB2 2PT, UK; <sup>10</sup> Department of Cardiovascular Sciences, University of Leicester, Glenfield Hospital, Groby Road, Leicester, LE3 9QP, UK; <sup>11</sup> Department of Statistics, University of Oxford, 1 South Parks Road, Oxford OX1 3TG, UK; <sup>12</sup> Cancer Research UK Genetic Epidemiology Unit, Strangeways Research Laboratory, Worts Causeway, Cambridge CB1 8RN, UK; <sup>13</sup> National Health Service Blood and Transplant, Sheffield Centre, Longley Lane, Sheffield S5 7JN, UK; <sup>14</sup> National Health Service Blood and Transplant, Brentwood Centre, Crescent Drive, Brentwood, CM15 8DP, UK; <sup>15</sup> The Welsh Blood Service, Ely Valley Road, Talbot Green, Pontyclun, CF72 9WB, UK; <sup>16</sup> The Scottish National Blood Transfusion Service, Ellen's Glen Road, Edinburgh, EH17 7QT, UK; <sup>17</sup> National Health Service Blood and Transplant, Southampton Centre, Coxford Road, Southampton, SO16 5AF, UK; <sup>18</sup> Avon Longitudinal Study of Parents and Children, University of Bristol, 24 Tyndall Avenue, Bristol, BS8 1TQ, UK; <sup>19</sup> Division of Community Health Services, St George's University of London, Cranmer Terrace, London SW17 0RE, UK; <sup>20</sup> Institute of Child Health, University College London, 30 Guilford St, London WC1N 1EH, UK; <sup>21</sup> University of Aberdeen, Institute of Medical Sciences, Foresterhill, Aberdeen, AB25 2ZD, UK; <sup>22</sup> Department of Psychiatry, Division of Neuroscience, Birmingham University, Birmingham, B15 2QZ, UK; <sup>23</sup> Department of Psychological Medicine, Henry Wellcome Building, School of Medicine, Cardiff University, Heath Park, Cardiff CF14 4XN, UK; <sup>24</sup> SGDP, The Institute of Psychiatry, King's College London, De Crespigny Park Denmark Hill London SE5 8AF, UK; <sup>25</sup> School of Neurology, Neurobiology and Psychiatry, Royal Victoria Infirmary, Queen Victoria Road, Newcastle upon Tyne, NE1 4LP, UK; <sup>26</sup> LIGHT and LIMM Research Institutes, Faculty of Medicine and Health, University of Leeds, Leeds, LS1 3EX, UK; <sup>27</sup> IBD Research Group, Addenbrooke's Hospital, University of Cambridge, Cambridge, CB2 2QQ, UK; <sup>28</sup> Gastrointestinal Unit, School of Molecular and Clinical Medicine, University of Edinburgh, Western General Hospital, Edinburgh EH4 2XU UK; <sup>29</sup> Department of Medical & Molecular Genetics, King's College London School of Medicine, 8th Floor Guy's Tower, Guy's Hospital, London, SE1 9RT, UK; <sup>30</sup> Institute for Digestive Diseases, University College London Hospitals Trust, London, NW1 2BU, UK; <sup>31</sup> Department of Gastroenterology, Guy's and St Thomas' NHS Foundation Trust, London, SE1 7EH, UK; <sup>32</sup> Department of Gastroenterology & Hepatology, University of Newcastle upon Tyne, Royal Victoria Infirmary, Newcastle upon Tyne, NE1 4LP, UK; <sup>33</sup> Gastroenterology Unit, Radcliffe Infirmary, University of Oxford, Oxford, OX2 6HE, UK; <sup>34</sup> Medicine and Therapeutics, Aberdeen Royal Infirmary, Foresterhill, Aberdeen, Grampian AB9 2ZB, UK; <sup>35</sup> Clinical Pharmacology Unit and the Diabetes and Inflammation Laboratory, University of Cambridge, Addenbrookes Hospital, Hills Road, Cambridge CB2 2QQ, UK; <sup>36</sup> Centre National de Genotypage, 2, Rue Gaston Cremieux, Evry, Paris 91057.; <sup>37</sup> BHF Glasgow Cardiovascular Research Centre, University of Glasgow, 126 University Place, Glasgow, G12 8TA, UK; <sup>38</sup> Clinical Pharmacology and Barts and The London Genome Centre, William Harvey Research Institute, Barts and The London, Queen Mary's School of Medicine, Charterhouse Square, London EC1M 6BQ, UK; <sup>39</sup> Cardiovascular Medicine, University of Oxford, Wellcome Trust Centre for Human Genetics, Roosevelt Drive, Oxford OX3 7BN, UK; <sup>40</sup> arc Epidemiology Research



Unit, University of Manchester, Stopford Building, Oxford Rd, Manchester, M13 9PT, UK; <sup>41</sup> Department of Paediatrics, University of Cambridge, Addenbrooke's Hospital, Cambridge, CB2 2QQ, UK; <sup>42</sup> Genetics of Complex Traits, Institute of Biomedical and Clinical Science, Peninsula Medical School, Magdalen Road, Exeter EX1 2LU UK; <sup>43</sup> Diabetes Genetics, Institute of Biomedical and Clinical Science, Peninsula Medical School, Barrack Road, Exeter EX2 5DU UK; <sup>44</sup> Centre for Diabetes and Metabolic Medicine, Barts and The London, Royal London Hospital, Whitechapel, London, E1 1BB UK; <sup>45</sup> Diabetes Research Group, School of Clinical Medical Sciences, Newcastle University, Framlington Place, Newcastle upon Tyne NE2 4HH, UK; <sup>46</sup> The MRC Centre for Causal Analyses in Translational Epidemiology, Bristol University, Canynge Hall, Whiteladies Rd, Bristol BS2 8PR, UK; <sup>47</sup> MRC Laboratories, Fajara, The Gambia; <sup>48</sup> Diamantina Institute for Cancer, Immunology and Metabolic Medicine, Princess Alexandra Hospital, University of Queensland, Woolloongabba, Qld 4102, Australia; <sup>49</sup> Botnar Research Centre, University of Oxford, Headington, Oxford OX3 7BN, UK; <sup>50</sup> Department of Medicine, Division of Medical Sciences, Institute of Biomedical Research, University of Birmingham, Edgbaston, Birmingham B15 2TT, UK; <sup>51</sup> Section of Cancer Genetics, Institute of Cancer Research, 15 Cotswold Road, Sutton, SM2 5NG, UK; <sup>52</sup> Cancer Genome Project, The Wellcome Trust Sanger Institute, Wellcome Trust Genome Campus, Hinxton, Cambridge CB10 1SA, UK; <sup>53</sup> Department of Clinical Neurosciences, University of Cambridge, Addenbrooke's Hospital, Hills Road, Cambridge CB2 2QQ, UK; <sup>54</sup> PRESENT ADDRESS: Illumina Cambridge, Chesterford Research Park, Little Chesterford, Nr Saffron Walden, Essex, CB10 1XL, UK.

## 11. Cardiogenics Consortium

**Associazione per lo studio dell Trombosi in Cardiologia, 27100 Pavia, Italy:** Diego Ardissino

**EUROIMMUN AG, 23560 Lübeck, Germany:** Christian Krüger, Lars Komorowski, Christian Probst, Ulf Steller

**GSF GmbH, 85764 Neuherberg, Germany:** Thomas Meitinger, Erich Wichmann, Peter Lichtner

**Institut National de la Santé et de la Recherche Médicale (INSERM), 75654 Paris, France:** Francois Cambien, Laurence Tired

**Johannes Gutenberg-University of Mainz, 55099 Mainz, Germany:** Stefan Blankenberg, Karl Lackner, Thomas Münzel

**Queen's University of Belfast, Belfast BT71NN, UK:** Alun Evans, Frank Kee

**Sanquin Blood Supply Foundation, 1066 CX Amsterdam, The Netherlands:** Ellen van der Schoot, Jaap Jan Zwaginga

**Technische Universität München, 80333 München, Germany:** Dietlind Zohlhoefer

**TRIUM Analysis Online GmbH, 81677 München, Germany:** Martin Daumer, Michael Scholz

**The Chancellor, Master and Scholar of the University of Cambridge, Cambridge CB2 1TS, UK:** Willem Ouwehand, Richard Farndale, Nicholas Watkins

**University of Leeds, Leeds LS2 9JT Leeds, UK:** Alistair Hall, Stephen Ball, Tim Bishop

**University of Leicester, Leicester LE1 7RH, UK:** Nilesh Samani, Alison Goodall, Paul Burton

**University of Lübeck, 23538 Lübeck, Germany:** Heribert Schunkert, Jeanette Erdmann, Andreas Ziegler

**University of Regensburg, 93053 Regensburg, Germany:** Christian Hengstenberg, Gerd Schmitz

**University of Uppsala, 75105 Uppsala, Sweden:** Ann-Christin Syvänen, Tomas Axelsson, Ulrika Liljedahl

**Wellcome Trust Sanger Institute, Hinxton Cambridge CB10 1SA, UK:** Panos Deloukas, Jane Rogers, Kate Rice
